# Supplementary material for: PSSMHCpan: a novel PSSM-based software for predicting class I peptide-HLA binding affinity
Source: PubMed Central journal article supplement (PMC5467046; doi:10.1093/gigascience/gix017), 2017-03-15

[Click here to view linked References](#)

# 1 PSSMHCpan: a novel PSSM based software for predicting class I 2 peptide-HLA binding affinity

3  
4  
5  
6  
7  
8  
9 Geng Liu<sup>†1</sup>, Dongli Li<sup>†1</sup>, Si Qiu<sup>1, 2</sup>, Wenhui Li<sup>1</sup>, Kun Ma<sup>1</sup>, Jian Wang<sup>1, 3</sup>, Huanming Yang<sup>1, 3</sup>, Yong  
10 Hou<sup>\*1, 4</sup>, Bo Li<sup>\*1, 5</sup>

11  
12  
13  
14  
15  
16  
17  
18  
19  
20  
21  
22  
23  
24  
25  
26  
27  
28  
29  
30  
31  
32  
33  
34  
35  
36  
37  
38  
39  
40  
41  
42  
43  
44  
45  
46  
47  
48  
49  
50  
51  
52  
53  
54  
55  
56  
57  
58  
59  
60  
61  
62  
63  
64  
65

6  
1<sup>1</sup>BGI-Shenzhen, Shenzhen 518083 China

7  
2<sup>2</sup>BGI Education Center, University of Chinese Academy of Sciences, Shenzhen 518083, China

8  
3<sup>3</sup>James D. Watson Institute of Genome Sciences, Hangzhou 310058, China

9  
4<sup>4</sup>Department of Biology, University of Copenhagen, Denmark

10  
5<sup>5</sup>BGI-Forensics, Shenzhen 518083, China

11  
†These authors contributed equally to this work as first authors.

12  
\*To whom correspondence should be addressed. Tel: (86) 18680679919; Fax: (86) 0755-25273620;

13  
E-mail: [libo@genomics.cn](mailto:libo@genomics.cn) (B.L.). Correspondence may also be addressed. E-mail:

14  
[huyong@genomics.cn](mailto:huyong@genomics.cn) (Y.H.).

## 16 Abstract

17 **Background:** Predicting peptides binding affinity with human leukocyte antigen (HLA) is a crucial  
18 step in developing powerful antitumor vaccine for cancer immunotherapy. Currently available methods  
19 work reasonably well in predicting peptide binding affinity with HLA-A\*0201, HLA-A\*0101, and  
20 HLA-B\*0702 in terms of sensitivity and specificity. However, it is unknown whether these methods  
21 can also predict well with other HLA alleles that are present in majority of human populations.

22 **Result:** Here we present a Position Score Specific Matrix (PSSM) based software called PSSMHCpan  
23 to accurately and efficiently predict peptide binding affinity with a broad coverage of HLA class I  
24 alleles. By analyzing 10 cross-validations on training database of 87 HLA alleles and an independent

1  
2  
3  
4  
5  
6  
7  
8  
9  
10  
11  
12  
13  
14  
15  
16  
17  
18  
19  
20  
21  
22  
23  
24  
25 dataset with NetMHC-4.0, NetMHCpan-3.0, PickPocket, and PSSMHCpan, we found that  
26 PSSMHCpan is substantially better than the other three methods with accuracy ACC of 0.92 and  
27 sensitivity of 0.87, as compared to 0.85, 0.85, 0.72 in 10 cross-validations and 0.73, 0.79, 0.75 in the  
28 independent dataset evaluation. In addition, PSSMHCpan is more than 763 times faster than other three  
29 methods to predict neoantigens from a breast tumor sample. Finally we built a neoantigen prediction  
30 pipeline and identified 117,017 neoantigens from 467 cancer samples of diverse cancers from TCGA.

31 **Conclusion:** PSSMHCpan is superior to currently available methods in predicting peptide binding  
32 affinity with a broad coverage of HLA class I alleles.

33 **Key words:** Antitumor vaccine, peptide-HLA binding affinity, PSSMHCpan, neoantigen.

## 34 35 **Background**

36 Cancer immunotherapy has been proved to be a promising strategy that enhances the strengths of the  
37 immune system of cancer patients to fight cancer in recent years. This strategy exploits the fact that  
38 surface of cancer cells have a variety of tumor antigens (i.e. peptides of 8-13 residues in lengths)  
39 coming from various kinds of mutated proteins cleaved by the proteasomes intracellular. These  
40 peptides are bound to HLA class I allelic specific molecules, forming peptide-HLA complexes which  
41 are presented to T cell receptors (TCRs). If TCRs can recognize the complexes on the surface of cancer  
42 cells, cytotoxic T lymphocytes (CTLs) will destroy cancer cells. Cancer cells are highly heterogeneous  
43 in terms of morphological, phenotypical and genetic profiles. Cancer cells of different tumors and  
44 within the same tumor could present hundreds of different types of peptides. The immune system of  
45 cancer patients could only recognize small populations of cancer cells. In order to enhance the power of  
46 the CTLs to recognize and eradicate as many cancer cells as possible, one strategy is to vaccinate  
47 cancer patients with complex antitumor peptides. The first step to develop powerful antitumor vaccines  
48 is to predict peptide binding affinity with HLA class I allele.

1 49 In order to predict peptide binding affinity with HLA class I allele, four types of methods have been  
2  
3 50 developed, including structure based methods, machine learning based methods, PSSM based methods  
4  
5  
6 51 [1] and combined methods. The structure based methods predict peptide binding affinity by calculating  
7  
8  
9 52 the minimum free energy of peptide-HLA complex [2], which allows us to understand the peptide-HLA  
10  
11  
12 53 binding affinity at the structure level. However, the predicting speed of this types of methods is  
13  
14  
15 54 extremely slow, and inaccurate due to limited number of available crystal structures [3]. The machine  
16  
17  
18 55 learning based methods predict peptide binding affinity by learning a function that maps a given  
19  
20  
21 56 peptide to binding affinity based on available known bound peptides (binders). These methods can  
22  
23  
24 57 accurately predict peptides with specific HLA alleles of HLA-A\*0201, HLA-A\*0101, and  
25  
26  
27 58 HLA-B\*0702 [4, 5]. Hence, they are widely used in many studies [6-8]. Thus far, many methods of  
28  
29  
30 59 machine learning have been developed, including support vector machine based method MHC2PRED  
31  
32  
33 60 [9], hidden markov model based method S-HMM [10], artificial neural network based method  
34  
35  
36 61 NetMHC [11, 12], and pan-specific method NetMHCpan [13-15]. However, machine learning methods  
37  
38  
39 62 cannot accurately predict peptide binding affinity with a broad range of HLA class I allelic coverage.  
40  
41  
42 63 Further, they are inefficient in predicting peptides from a large amount of sequencing data. The PSSM  
43  
44  
45 64 based methods predict peptide binding affinity by building a matrix from multiple peptides alignment  
46  
47  
48 65 results that represent the motif information (i.e. the binding anchor). These methods have a faster  
49  
50  
51 66 predicting speed because linear computational complexity of PSSM is much lower than nonlinear  
52  
53  
54 67 computational complexity of structure and machine learning based methods. Based on the mechanism  
55  
56  
57 68 of PSSM, several software have been developed such as PickPocket [16], SVMHC [17] and nHLAPred  
58  
59  
60 69 [18]. However the accuracy of current software is less than machine learning based methods [16].  
61  
62  
63 70 Recently, in order to predict peptide-HLA binding affinity more accurately, scientists from several  
64  
65

1 71 groups combined different methods to develop new software including NetMHCcons [19], IEDB [20]  
2  
3 72 and HLaffy [21]. Although these combined methods indeed have shown a better predictive  
4  
5  
6 73 performance as compared to individual methods, their predictive accuracy are still not satisfactory,  
7  
8  
9 74 especially in clinical applications [22]. In order to develop more effective immunotherapy, it is  
10  
11  
12 75 necessary to develop better software that can more accurately and efficiently predict peptide binding  
13  
14  
15 76 affinity with a broad coverage of HLA class I alleles.

16  
17 77 Here, we present a novel software called PSSMHCpan. We designed this software based on the  
18  
19  
20 78 PSSM mechanism and using a more comprehensive training database containing 63,099 peptide-HLA  
21  
22  
23 79 pairs to allele-specifically predict peptide binding affinity with HLA class I allele. In order to predict  
24  
25  
26 80 peptide binding affinity with a broad coverage of HLA class I alleles, we induce a simple but powerful  
27  
28  
29 81 pan-specific prediction approach based on the similarity of HLA protein sequences. We show that  
30  
31  
32 82 PSSMHCpan can predict peptide binding affinity with a broad HLA class I allelic coverage of at least  
33  
34  
35 83 87 types more accurately and efficiently than other available methods in 10 cross-validations and  
36  
37  
38 84 independent dataset evaluation. Based on PSSMHCpan, we built a prediction pipeline to identify  
39  
40  
41 85 neoantigens in 467 TCGA tumor samples across 10 types of cancers.

42 86

## 43 44 87 **Methods**

45  
46  
47 88 PSSM is represented as a motif of multiple sequence alignment result [23]. The basic principle of  
48  
49  
50 89 PSSMHCpan is that peptides that bind to a specific HLA allele possess the motif information that can  
51  
52  
53 90 be studied by PSSM. We propose the PSSMHCpan in two novel aspects. Firstly, we construct a  
54  
55  
56 91 comprehensive training database to build allele-specific PSSMs for predicting peptide binding affinity  
57  
58  
59 92 with characterized HLA class I allele (with binders in training database). Secondly, we use the

1 93 similarity of HLA sequences to induce a simple but powerful pan-specific prediction approach based  
2  
3 94 on our hypothesis below to predict peptide binding affinity with uncharacterized HLA class I allele  
4  
5  
6 95 (without binder in training database). It is well known that peptides on the cell surface are bound to the  
7  
8  
9 96 floor of the peptide-binding groove that is in the central region of the  $\alpha 1/\alpha 2$  heterodimer (a molecule  
10  
11  
12 97 composed of two non-identical subunits) of HLA protein sequences [24]. By analyzing the sequences  
13  
14  
15 98 of HLA proteins, we noticed that HLA protein sequences are highly similar among different HLA  
16  
17  
18 99 alleles (Figure 1), and that peptides bound to similar HLA alleles have similar binding affinity  
19  
20 100 according to predictive value of IC50. Thereby, we hypothesize that since different HLA protein  
21  
22  
23 101 sequences are similar, the peptide binding affinity with different HLA alleles should be similar too.  
24  
25 102 Based on this hypothesis and the PSSM mechanism, we design the software PSSMHCPan as following  
26  
27  
28 103 three steps: PSSM construction, allele-specific prediction, and pan-specific prediction. The flowchart of  
29  
30  
31 104 PSSMHCPan is shown in Figure 2.

32  
33  
34 105

### 35 36 106 **PSSM construction**

37  
38  
39 107 We define PSSM as a matrix of M rows (Amino acid; M=20) and N columns (Length; N=8~25). Each  
40  
41  
42 108 element  $P_{ai}$  in the matrix is the likelihood of a given character (amino acid) at its position. We  
43  
44  
45 109 calculate the element  $P_{ai}$  through the following function,

$$46  
47 110 \quad P_{ai} = \log \frac{F_{ai} + \omega}{BG_a}$$

48  
49  
50 111 Where  $F_{ai}$  denotes the frequency of amino acid  $a$  at position  $i$ ;  $BG_a$  denotes the background  
51  
52  
53 112 frequency of amino acid  $a$  from UniProt database [25]; and  $\omega$  is a random value (ranging from 0 to 1)  
54  
55  
56 113 generated from Dirichlet distribution [26].

57  
58  
59 114

1 115 **Allele-specific prediction**

2  
3 116 To qualitatively predict peptide binding affinity with characterized HLA allele, we define a  
4  
5  
6 117 *binder\_score* as a sum of the corresponding values of each amino acid of a given peptide at each  
7  
8  
9 118 position in the corresponding allele-specific PSSM.

10  
11  
12 119 
$$\text{binder\_score} = \frac{\sum_{i=1}^N P_{ai}}{N}$$

13  
14 120 We consider a peptide with *binder\_score* > 0 as a binder. The higher *binder\_score* that a peptide has,  
15  
16  
17 121 the higher binding affinity this peptide would have.

18  
19  
20 122 We convert a binding affinity score (*binder\_score*) into an IC50 value as follows:

21  
22  
23 123 
$$\text{IC50} = 50000^{Max - \text{binder\_score} / Max - Min}$$

24  
25 124 Where Max and Min denote the maximum and the minimum *binder\_score*, respectively. We  
26  
27  
28 125 consider a peptide with *IC50* < 500nM as a binder and a peptide with *IC50* < 50nM as a strong binder.

29  
30  
31 126  
32  
33 127 **Pan-specific prediction**

34  
35  
36 128 Firstly, we construct a library of HLA similar weight (Button panel in Figure 2) that contains pairs of  
37  
38  
39 129 characterized and uncharacterized HLA alleles, and each pair has a weight value. We determine a pair  
40  
41  
42 130 of characterized and uncharacterized HLA alleles by using the BLOSUM62 [27] based BLAST  
43  
44  
45 131 alignment results of HLA protein sequences, and assign the alignment score as the weight value. We  
46  
47  
48 132 also extracted the nearest distance of HLA alleles from NetMHCpan-3.0 [15] as a pair of characterized  
49  
50  
51 133 and uncharacterized HLA alleles and assigned a constant as the weight value.

52  
53 134 Secondly, we qualitatively predict the binding affinity of a given peptide with uncharacterized HLA  
54  
55  
56 135 allele with an *IC50<sub>un</sub>* value which is calculated as below:

57  
58 136 
$$\text{IC50}_{un} = \frac{\sum_{i=1}^S w_i * \text{IC50}_i}{\sum_{i=1}^S w_i}$$

137 Where  $S$  denotes the sum of characterized HLA alleles that pair up the specific uncharacterized  
 138 HLA allele according to the library of HLA similar weight.  $w_i$  and  $IC50_i$  denote the weight value  
 139 and the allele-specific prediction result of peptide binding affinity with HLA allele  $i$ . We also consider a  
 140 peptide with  $IC50_{un} < 500nM$  as a binder, and a peptide with  $IC50_{un} < 50nM$  as a strong binder.

141

142 **Data Description**

143 We collected our training database of HLA class I binders from the following resources: the Immune  
 144 Epitope Database and Analysis Resource (IEDB) [28], IEDB benchmark [29], SYFPEITHI [30],  
 145 MHCBN [31], and in-house experimental epitopes. After removing duplications, we obtained 64,677  
 146 peptide-HLA pairs that cover 162 HLA alleles (Table 1). We only selected HLA alleles that consist of  
 147 at least 10 binders with a fixed length. Finally, we built 241 PSSMs for allele-specific prediction of  
 148 peptide binding affinity with 123 HLA class I alleles (Additional file 1: Table S1).

149 **Table 1** Summary of training database.

| Database           | IEDB   | IEDB<br>benchmark | SYFPEITHI | MHCBN | Combined | Training<br>database |
|--------------------|--------|-------------------|-----------|-------|----------|----------------------|
| <b>HLA alleles</b> | 166    | 95                | 109       | 103   | 162      | 123                  |
| <b>Binders</b>     | 54,272 | 40,930            | 3,329     | 4,070 | 64,677   | 63,099               |

150 We collected 64 uncharacterized HLA class I alleles that cannot be predicted with NetMHC-4.0 but  
 151 can be predicted with NetMHCpan-3.0. We extracted 2064 binders that bind to the 64 uncharacterized  
 152 HLA alleles from our training database as a dataset for pan-specific evaluation.

153 To construct a library of HLA weight similarity, we collected 657,397 pairs of characterized and  
 154 uncharacterized HLA class I alleles from 13,957 HLA protein sequences in IMGT/HLA (Release  
 155 3.23.0) [32], and 2800 pairs from the nearest distance of HLA alleles in NetMHCpan-3.0, respectively.

1 156 After removing duplications, we retained 657,930 pairs for pan-specific prediction of peptide binding  
2  
3 157 affinity with 4,778 HLA class I alleles (Additional file 1: Table S1).  
4  
5

6 158 We also collected an independent dataset of binders from the Peptide Database of Cancer Immunity  
7  
8 159 [33]. Then we selected 285 binders that cover 38 HLA alleles of HLA-A, HLA-B, HLA-C, including  
9  
10 160 35 from tumor antigens resulting from mutations, 91 from shared tumor-specific antigens, 63 from  
11  
12 161 differentiation antigens and 96 from antigens overexpressed in tumors. After removing duplications, we  
13  
14 162 retained 273 binders for validation.  
15  
16  
17  
18  
19

20 163 To detect pan-cancer neoantigens, we obtained somatic mutations of 467 TCGA cancer samples  
21  
22 164 across 10 cancer types (Table 2) from GDC data portal (<https://gdc-portal.nci.nih.gov/>) and the RSEM  
23  
24 165 gene expression data of these tumors and their corresponding normal samples from FireBrowse  
25  
26  
27  
28 166 (<http://firebrowse.org/>). We also obtained the tumor RNASeq aligned bam files from dbGAP.  
29  
30  
31  
32

33 168 **Table 2 Summary of 467 cancer samples from TCGA cohort.**  
34

| Cancer type | Patient # | Cancer type | Patient # |
|-------------|-----------|-------------|-----------|
| BLCA        | 19        | LIHC        | 47        |
| BRCA        | 93        | LUAD        | 57        |
| COAD        | 16        | PRAD        | 43        |
| HNSC        | 39        | STAD        | 28        |
| KIRC        | 67        | THCA        | 58        |

52 169  
53  
54 170 **Analyses**

55  
56  
57 171 **Evaluation of peptide binding affinity prediction with a broad HLA class I allelic coverage**  
58  
59  
60



172 In order to evaluate the allele-specific prediction accuracy of PSSMHCpan with a broad HLA class I  
173 allelic coverage, we performed 10 cross-validations on training data of 87 HLA class I alleles that  
174 contain at least 12 binders. We generated non-binders randomly with the same number of binders, and  
175 performed allele-specific prediction of peptide-HLA binding affinity using our PSSMHCpan, and the  
176 two well-known and currently considered as the best software for peptide-HLA binding affinity  
177 prediction NetMHC-4.0 and NetMHCpan-3.0 [4], and with the latest reported PSSM based software  
178 PickPocket, respectively. We found that the performance of the four software appeared similar in terms  
179 of the average area under receiver operating characteristic curve (AUC) with the HLA alleles of  
180 HLA-A\*0101, HLA-A\*0201, and HLA-B\*0702 (Additional file 1: Table S2). However, in terms of the  
181 prediction accuracy ACC ( $ACC = \frac{TP+TN}{TP+FP+TN+FN}$ , where TP, FP, TN and FN, represent true-positive,  
182 false-positive, true-negative and false-negative) under the cutoff at 500nM, PSSMHCpan is larger than  
183 NetMHC-4.0, NetMHCpan-3.0 and PickPocket (Table 3), suggesting that the PSSMHCpan delivers  
184 more accurate than the other three software in predicting peptide binding affinity with the HLA alleles  
185 of HLA-A\*0101, HLA-A\*0201, and HLA-B\*0702 at 500nM. We also noticed that although the overall  
186 AUC of PSSMHCpan is slightly larger than that of any of the software with the rest HLA class I alleles  
187 (ranging from 1% to 2%; Figure 3a), the ACC of PSSMHCpan is much larger than those of other three  
188 software (ranging from 7% to 20%). By comparing the ACC of each HLA allele with a fixed peptide  
189 length among the four software, we found that the median ACC of PSSMHCpan is significantly larger  
190 than other three software ( $P < 0.01$ , *Paired T test*; Figure 3b).

192 **Table 3** Assessments (ACC values) of four software to predict peptide binding affinity with three HLA  
193 alleles.

|                      | <b>A*0101</b> | <b>A*0201</b> | <b>B*0702</b> | <b>A*0101</b> | <b>A*0201</b> | <b>B*0702</b> |
|----------------------|---------------|---------------|---------------|---------------|---------------|---------------|
|                      | <b>9mer</b>   | <b>9mer</b>   | <b>9mer</b>   | <b>10mer</b>  | <b>10mer</b>  | <b>10mer</b>  |
| <b>PSSMHCpan</b>     | <b>0.96</b>   | <b>0.88</b>   | <b>0.91</b>   | <b>0.96</b>   | <b>0.92</b>   | <b>0.96</b>   |
| <b>NetMHC-4.0</b>    | 0.86          | 0.86          | 0.87          | 0.86          | 0.88          | 0.90          |
| <b>NetMHCpan-3.0</b> | 0.85          | 0.86          | 0.87          | 0.83          | 0.87          | 0.88          |
| <b>PickPocket</b>    | 0.65          | <b>0.88</b>   | 0.85          | 0.53          | 0.89          | 0.81          |

194

195 Considering a one-time 10 cross-validation of randomly selection and non-binders construction  
 196 might produce biased results, we repeated another five times of 10 cross-validations, and found that  
 197 (Table 4) the standard deviations (SD) of AUCs are  $\leq 0.0005$ , indicating no bias in the 10  
 198 cross-validation.

199 **Table 4** The AUC and SD values in 5 times 10 cross-validations.

| Time | PSSMHCpan | NetMHC-4.0 | NetMHCpan-3.0 | PickPocket |
|------|-----------|------------|---------------|------------|
| 1    | 0.9693    | 0.9623     | 0.965         | 0.9494     |
| 2    | 0.9703    | 0.9633     | 0.9661        | 0.9507     |
| 3    | 0.9703    | 0.9633     | 0.9661        | 0.9506     |
| 4    | 0.9699    | 0.9632     | 0.966         | 0.9505     |
| 5    | 0.9699    | 0.9633     | 0.9657        | 0.9506     |
| SD   | 0.0004    | 0.0004     | 0.0005        | 0.0005     |

200  
 201 To evaluate our pan-specific prediction, we retrained PSSMs without binders from the dataset for  
 202 pan-specific evaluation. And then we predicted binders from the dataset for pan-specific evaluation and  
 203 2,064 randomly constructed non-binders by PSSMHCpan. Although the AUC of PSSMHCpan (0.93) is  
 204 slightly lower than those of NetMHCpan-3.0 and PickPocket (0.96; Figure 3c; Additional file 1: Table  
 205 S3), the ACC of PSSMHCpan (0.86) is much larger than those two software (0.75 and 0.73). By  
 206 comparing the allele-specific prediction and pan-specific prediction of 3,408 correctly predicted  
 207 peptides from the dataset for pan-specific evaluation, we found a high correlation between  
 208 allele-specific and pan-specific prediction (Pearson' rho=0.89,  $P<0.01$ ; Figure 3d), suggesting that our  
 209 PSSMHCpan can quantitatively predict peptide-HLA binding affinity with profound accuracy.

210 We compared the performance of our PSSMHCpan with the latest software HLaffy developed by  
 211 Mukherjee et al (2016) using the same peptides from the MHCBN. We removed all the binders from  
 212 MHCBN in our training database and retrained our PSSMs with the rest of binders. Because the  
 213 number of non-binders is much smaller than that of the binders in MHCBN, we only used binders to  
 214 evaluate and calculated the prediction accuracy by sensitivity ( $\text{Sen} = \frac{TP}{TP+FP}$ ). We found that our  
 215 PSSMHCpan correctly detected 1309 binders, while HLaffy correctly detected 1179 binders (Table 5).

216 **Table 5** Assessments of PSSMHCpan and HLaffy. The prediction of HLaffy was performed on  
 217 webserver (<http://proline.biochem.iisc.ernet.in/HLaffy/>).

| Allele     | PSSMHCpan | HLaffy |
|------------|-----------|--------|
| HLA-A*0201 | 100.00%   | 91.99% |
| HLA-A*0203 | 100.00%   | 93.22% |

|            |                |        |
|------------|----------------|--------|
| HLA-A*0206 | <b>100.00%</b> | 93.44% |
| HLA-A*0301 | <b>100.00%</b> | 83.93% |
| HLA-A*1101 | <b>100.00%</b> | 96.00% |
| HLA-A*2402 | <b>100.00%</b> | 76.60% |
| HLA-A*3301 | <b>100.00%</b> | 83.33% |
| HLA-A*6801 | <b>100.00%</b> | 94.12% |
| HLA-A*6802 | <b>95.45%</b>  | 72.73% |
| HLA-B*0702 | <b>100.00%</b> | 87.88% |
| HLA-B*3501 | <b>99.16%</b>  | 89.08% |
| HLA-B*5301 | <b>100.00%</b> | 91.84% |
| HLA-B*5401 | <b>100.00%</b> | 88.10% |
| All        | <b>99.85%</b>  | 89.93% |

218

## 219 Evaluation of peptide binding affinity prediction with an independent dataset

220 Considering cross validation might overestimate prediction accuracy, we reevaluated PSSMHCpan,  
 221 NetMHC-4.0, NetMHCpan-3.0 and PickPocket with an independent dataset containing 273  
 222 non-duplicated experimental binders from the Peptide Database of Cancer Immunity. If a peptide binds  
 223 to any 4-digital HLA allele that belong to the given 2-digital HLA allele with a predicting binding  
 224 affinity IC50 less than 500nM, we considered as binder. Totally, 245 of 273 (90%) binders were  
 225 identified with the four software. Of the 245 binders identified, PSSMHCpan, NetMHC-4.0,  
 226 NetMHCpan-3.0 and PickPocket identified 237, 199, 216, and 204, respectively (Figure 4; Additional  
 227 file 1: Table S4), again indicating that PSSMHCpan can predict more binders than either NetMHC-4.0,  
 228 NetMHCpan-3.0, or PickPocket can.

229

## 230 Evaluation of the software efficiency

231 As whole genome sequencing (WGS) and whole exome sequencing (WES) of cancer genome data are  
 232 rapidly increasing, there is an urgent need to develop software that can quickly identify neoantigens  
 233 from cancer genome data. To compare the efficiency of PSSMHCpan, NetMHC-4.0, NetMHCpan-3.0

234 and PickPocket (Table 6), we first calculated the predicting speed of 10-cross validation on training  
 235 database with 87 HLA class I alleles and found that PSSMHCpan is much faster than other three. We  
 236 then used each software to independently predict binding affinity of the same set of 661,263 peptides  
 237 generated from a breast tumor sample containing 3062 somatic mutations and 6 HLA class I alleles. We  
 238 found that it took about 6 seconds for PSSMHCpan to complete the analysis. In contrast, NetMHC-4.0,  
 239 took 3.61 hours, NetMHCpan-3.0 took 28.63 hours, and PickPocket took 1.34 hours to complete the  
 240 analysis. In general, PSSMHCpan are not only more accuracy but also faster than other methods.

241 **Table 6** The predicting speed (CPU time) of the four software. The fastest ones were marked in bold.

| Methods          | 10-cross validations | Breast tumour neoantigens prediction |
|------------------|----------------------|--------------------------------------|
| <b>PSSMHCpan</b> | <b>18.40s</b>        | <b>6.34s</b>                         |
| NetMHC-4.0       | 1056.83s             | 13001.57s                            |
| NetMHCpan-3.0    | 5371.16s             | 103060.24s                           |
| PickPocket       | 282.83s              | 4839.63s                             |

242 CPU time was measured by second (s).

#### 244 **Pan-cancer neoantigens**

245 To identify neoantigens that can be used as candidate markers to develop antitumor vaccine, we  
 246 develop a neoantigen prediction pipeline to determine what types of mutated peptides in cancer cells  
 247 could be brought to the cell surface by HLAs based on somatic small mutations (SSMs). In order to  
 248 maximize prediction accuracy, we include PSSMHCpan, NetMHC-4.0, NetMHCpan-3.0 and  
 249 PickPocket into our pipeline to detect neoantigens in TCGA tumor samples as following (Figure 5a).  
 250 We first annotate missense SSMs including single nucleotide variants (SNVs), insertions and deletions

1 251 (InDels) with ANNOVAR [34] to create a list of tumor-specific peptides (8-13) with an in-house script.  
2  
3 252 After HLA alleles are predicted with Seq2HLA [35], we predict neoantigens with PSSMHCpan,  
4  
5  
6 253 NetMHC-4.0, NetMHCpan-3.0 and PickPocket, respectively. Finally, we select a list of neoantigens  
7  
8  
9 254 that meet the following conditions: 1) Predicting as binders ( $IC_{50} < 500nM$ ) by at least 2 software and  
10  
11  
12 255 taking the median value of  $IC_{50}$  as final result; 2) The  $IC_{50}$  value of a given SNV-derived neoantigen  
13  
14  
15 256 must be smaller than that of its corresponding wild type (WT) peptide [36]. Using this pipeline, we  
16  
17  
18 257 analyzed the neoantigens across 10 cancer types from TCGA cohort.

19  
20 258 Totally we identified 117,017 neoantigens from 467 TCGA cancer samples. We calculated the  
21  
22  
23 259 number of neoantigens per SSM in different types of cancer and observed that STAD, PRAD and  
24  
25  
26 260 BRCA had the highest neoantigens with 2.54, 1.52 and 1.43 per SNV, respectively (Figure 5b), whereas  
27  
28  
29 261 the highest neoantigens per InDel were 2.76, 2.59 and 2.34 in PRAD, STAD and KIRC, respectively  
30  
31  
32 262 (Figure 5c). We also compared the neoantigen loads (number of neoantigens per sample) across 10  
33  
34  
35 263 cancer types and found that STAD, COAD and BLCA tumors had the highest neoantigen loads with  
36  
37  
38 264 median values of 302, 182 and 163, while the THCA tumors had a lowest median neoantigen load of 30  
39  
40  
41 265 (Figure 5d).

42 266 On average we identified 251 neoantigens in each tumor. We then investigated whether the  
43  
44  
45 267 expression level of HLA class I would be increased in cancer cells to bind neoantigens. Indeed, by  
46  
47  
48 268 looking at the mRNA expression in 467 TCGA tumor samples and their paired normal tissues, we  
49  
50  
51 269 found that the expression of HLA class I was markedly elevated in most tumors (Figure 5e). Since the  
52  
53  
54 270 amount of neoantigens differs substantially among different tumors, we examined whether the number  
55  
56  
57 271 of neoantigens was correlated with HLA class I expression level in each tumor. However, we did not  
58  
59  
60 272 find a correlation between the number of neoantigens and the HLA class I expression levels in tumors

1 273 (Pearson' rho=-0.05, P=0.33).

2  
3 274

4  
5  
6 275 **Discussion**

7  
8  
9 276 Designing antitumor vaccine requires predicting peptide-HLA binding affinity with high accuracy. In  
10  
11 277 this article, we have presented a novel software PSSMHCpan that allows us to predict peptide binding  
12  
13 278 affinity with a broad coverage of HLA class I alleles. By comparing our PSSMHCpan with the most  
14  
15 279 popular machine learning based methods NetMHC-4.0, NetMHCpan-3.0 and the most recently  
16  
17 280 published PSSM based method PickPocket, we demonstrated that overall our PSSMHCpan is  
18  
19  
20  
21  
22 281 substantially better than the other three in predicting peptide-HLA binding affinity, in terms of accuracy  
23  
24  
25 282 and efficiency.

26  
27  
28 283 In recent years, PSSM based methods to predict peptide-HLA binding affinity were gradually  
29  
30 284 replaced by machine learning based methods that are believed to have reliable accuracy and larger data  
31  
32  
33 285 prediction capability [3]. However, by comparing our PSSMHCpan with machine learning based  
34  
35  
36 286 methods NetMHC-4.0 and NetMHCpan-3.0, we show that our PSSMHCpan exhibits a higher  
37  
38  
39 287 predicting accuracy than NetMHC-4.0 and NetMHCpan-3.0, respectively. In terms of data prediction  
40  
41  
42 288 capability, PSSMHCpan can allele-specifically and pan-specifically predict peptides that bind to 241  
43  
44  
45 289 and 4778 HLA class I alleles, while NetMHC-4.0 and NetMHCpan-3.0 can only predict 89 and 2924  
46  
47  
48 290 HLA class I alleles, respectively. Furthermore, the PSSMHCpan displays much higher prediction  
49  
50 291 efficiency as compared to NetMHC-4.0 and NetMHCpan-3.0 (Table 6).

51  
52  
53 292 We noticed that the size of training database appeared to directly affect the prediction accuracy. A  
54  
55  
56 293 larger training database could improve the prediction accuracy of PSSMHCpan. For instance, the  
57  
58  
59 294 PSSMHCpan prediction accuracy ACC in predicting 9mer peptides bind to HLA-A\*0101 and

1 295 HLA-B\*5703 are 0.96 and 0.70. We found that in our training database, there are 813 binders for  
2  
3 296 HLA-A\*0101 and only 25 binders for HLA-B\*5703, respectively. We believed that in order to improve  
4  
5  
6 297 the prediction accuracy, it is necessary to increase the size of training database.  
7

8  
9 298 Based on the evaluation results (Figure 4), we recognized that none of the available software is  
10  
11 299 perfect and that in order to maximize the prediction accuracy, it is necessary to use multiple software.  
12  
13 300 We then included PSSMHCpan, NetMHC-4.0, NetMHCpan-3.0 and PickPocket to build a neoantigen  
14  
15 301 prediction pipeline that allowed us to detect 117,017 neoantigens in 467 TCGA tumor samples across  
16  
17 302 10 types of cancer. We believe that in order to provide actionable neoantigens that can be used in  
18  
19 303 cancer immunotherapy, it requires more efforts to validate the function and immunogenicity of the  
20  
21 304 predicted neoantigens experimentally.  
22  
23  
24  
25  
26

27  
28 305 In conclusion, our PSSMHCpan can predict peptide binding affinity with a broad coverage of HLA  
29  
30 306 class I alleles more accurately and efficiently compared with currently most popular peptide binding  
31  
32 307 affinity prediction software. Our PSSMHCpan can not only help develop personalized antitumor  
33  
34 308 vaccines, but also has great potentials in other aspects of cancer immunotherapy including designing  
35  
36 309 dendritic cell (DC) vaccines, inducing DC-CTL, TCR-T, and assessing the PD-1/CTLA4 prognosis.  
37  
38  
39  
40  
41

42 310

#### 43 311 **Availability and requirements**

- 44 312 ● Project name: PSSMHCpan
- 45 313 ● Project home page: <https://github.com/BGI2016/PSSMHCpan>
- 46 314 ● Operating system: Platform independent
- 47 315 ● Programming language: Perl
- 48 316 ● Other requirements: ActivePerl 5.8

1 317 ● License: OSI

2  
3 318

4  
5  
6 319 **Availability of supporting data and materials**

7  
8  
9 320 The supporting data from this study will be hosted in the additional files and PSSMHCpan home page.

10  
11 321

12  
13  
14 322 **Additional file**

15  
16  
17 323 Additional file 1: Supplementary tables for supporting the analysis part

18  
19  
20 324 Table S1 is the list of HLA class I alleles for allele-specific and pan-specific prediction. Table S2 is

21  
22 325 10-cross validations results of alleles-specific prediction. Table S3 is the pan-specific prediction results.

23  
24  
25 326 Table S4 is prediction results the independent dataset.

26  
27  
28 327

29  
30 328 **Competing interests**

31  
32 329 The authors declare no competing financial interests.

33  
34  
35 330

36  
37  
38 331 **Authors' contributions**

39  
40 332 G. L., D. L., B. L. Y. H., J. W. and H. Y. conceived of study and designed the project. G. L. and D. L.

41  
42 333 performed software development, computational analyses and prepared figures. S. Q., W. L. performed

43  
44 334 pan-cancer neoantigen analysis. G. L., B. L. and K. M. wrote the manuscript.

45  
46 335

47  
48 336 **Acknowledgements**

49  
50 337 We thank L. Goodman and M Dean for their constructive advices on the manuscript. We also thank Lei

51  
52 338 Ge and Yan Liang for their administrative supports. We would like to thank The Cancer Genome Atlas

53  
54 339 (TCGA), International Cancer Genome Consortium (ICGC), and Chinese Cancer Genome Consortium

55  
56 340 (CCGC) for letting us using the sequencing data. This project was supported financially with funds

57  
58 341 from the Shenzhen Science and Technology Program (JCYJ20150629114130814).

59  
60 342



343 **Reference**

- 344 1. Liao WW, Arthur JW. Predicting peptide binding to Major Histocompatibility Complex molecules.  
345 Autoimmunity reviews. 2011;10(8):469-73. doi:10.1016/j.autrev.2011.02.003.
- 346 2. Schueler-Furman O, Altuvia Y, Sette A, Margalit H. Structure-based prediction of binding peptides to  
347 MHC class I molecules: application to a broad range of MHC alleles. Protein science : a publication of  
348 the Protein Society. 2000;9(9):1838-46. doi:10.1110/ps.9.9.1838.
- 349 3. Luo H, Ye H, Ng HW, Shi L, Tong W, Mendrick DL et al. Machine Learning Methods for Predicting  
350 HLA-Peptide Binding Activity. Bioinformatics and biology insights. 2015;9(Suppl 3):21-9.  
351 doi:10.4137/BBI.S29466.
- 352 4. Zhang GL, Ansari HR, Bradley P, Cawley GC, Hertz T, Hu X et al. Machine learning competition in  
353 immunology - Prediction of HLA class I binding peptides. Journal of immunological methods.  
354 2011;374(1-2):1-4. doi:10.1016/j.jim.2011.09.010.
- 355 5. Nielsen M, Lundegaard C, Worning P, Lauemoller SL, Lamberth K, Buus S et al. Reliable prediction of  
356 T-cell epitopes using neural networks with novel sequence representations. Protein science : a  
357 publication of the Protein Society. 2003;12(5):1007-17. doi:10.1110/ps.0239403.
- 358 6. Carreno BM, Magrini V, Becker-Hapak M, Kaabinejadian S, Hundal J, Petti AA et al. Cancer  
359 immunotherapy. A dendritic cell vaccine increases the breadth and diversity of melanoma  
360 neoantigen-specific T cells. Science. 2015;348(6236):803-8. doi:10.1126/science.aaa3828.
- 361 7. Yadav M, Jhunjunwala S, Phung QT, Lupardus P, Tanguay J, Bumbaca S et al. Predicting  
362 immunogenic tumour mutations by combining mass spectrometry and exome sequencing. Nature.  
363 2014;515(7528):572-6. doi:10.1038/nature14001.
- 364 8. Walter S, Weinschenk T, Stenzl A, Zdrojowy R, Pluzanska A, Szczylik C et al. Multi-peptide immune  
365 response to cancer vaccine IMA901 after single-dose cyclophosphamide associates with longer patient  
366 survival. Nature medicine. 2012;18(8):1254-61. doi:10.1038/nm.2883.
- 367 9. Lata S, Bhasin M, Raghava GP. Application of machine learning techniques in predicting MHC  
368 binders. Methods in molecular biology. 2007;409:201-15. doi:10.1007/978-1-60327-118-9\_14.
- 369 10. Noguchi H, Kato R, Hanai T, Matsubara Y, Honda H, Brusic V et al. Hidden Markov model-based  
370 prediction of antigenic peptides that interact with MHC class II molecules. Journal of bioscience and  
371 bioengineering. 2002;94(3):264-70.
- 372 11. Lundegaard C, Lund O, Nielsen M. Prediction of epitopes using neural network based methods.  
373 Journal of immunological methods. 2011;374(1-2):26-34. doi:10.1016/j.jim.2010.10.011.
- 374 12. Andreatta M, Nielsen M. Gapped sequence alignment using artificial neural networks: application  
375 to the MHC class I system. Bioinformatics. 2016;32(4):511-7. doi:10.1093/bioinformatics/btv639.
- 376 13. Hoof I, Peters B, Sidney J, Pedersen LE, Sette A, Lund O et al. NetMHCpan, a method for MHC class  
377 I binding prediction beyond humans. Immunogenetics. 2009;61(1):1-13.  
378 doi:10.1007/s00251-008-0341-z.
- 379 14. Nielsen M, Lundegaard C, Blicher T, Lamberth K, Harndahl M, Justesen S et al. NetMHCpan, a  
380 method for quantitative predictions of peptide binding to any HLA-A and -B locus protein of known  
381 sequence. PloS one. 2007;2(8):e796. doi:10.1371/journal.pone.0000796.
- 382 15. Nielsen M, Andreatta M. NetMHCpan-3.0; improved prediction of binding to MHC class I  
383 molecules integrating information from multiple receptor and peptide length datasets. Genome  
384 medicine. 2016;8(1):33. doi:10.1186/s13073-016-0288-x.
- 385 16. Zhang H, Lund O, Nielsen M. The PickPocket method for predicting binding specificities for  
386 receptors based on receptor pocket similarities: application to MHC-peptide binding. Bioinformatics.

387 2009;25(10):1293-9. doi:10.1093/bioinformatics/btp137.

1 388 17. Donnes P, Kohlbacher O. SVMHC: a server for prediction of MHC-binding peptides. *Nucleic acids*  
2 389 *research*. 2006;34(Web Server issue):W194-7. doi:10.1093/nar/gkl284.

4 390 18. Bhasin M, Raghava GP. A hybrid approach for predicting promiscuous MHC class I restricted T cell  
5 391 epitopes. *Journal of biosciences*. 2007;32(1):31-42.

7 392 19. Karosiene E, Lundegaard C, Lund O, Nielsen M. NetMHCcons: a consensus method for the major  
8 393 histocompatibility complex class I predictions. *Immunogenetics*. 2012;64(3):177-86.  
9 394 doi:10.1007/s00251-011-0579-8.

11 395 20. Trolle T, Metushi IG, Greenbaum JA, Kim Y, Sidney J, Lund O et al. Automated benchmarking of  
12 396 peptide-MHC class I binding predictions. *Bioinformatics*. 2015;31(13):2174-81.  
13 397 doi:10.1093/bioinformatics/btv123.

15 398 21. Mukherjee S, Bhattacharyya C, Chandra N. HLaffy: estimating peptide affinities for Class-1 HLA  
16 399 molecules by learning position-specific pair potentials. *Bioinformatics*. 2016.  
17 400 doi:10.1093/bioinformatics/btw156.

19 401 22. Backert L, Kohlbacher O. Immunoinformatics and epitope prediction in the age of genomic  
20 402 medicine. *Genome medicine*. 2015;7(1):119. doi:10.1186/s13073-015-0245-0.

22 403 23. Xia X. Position weight matrix, gibbs sampler, and the associated significance tests in motif  
23 404 characterization and prediction. *Scientifica*. 2012;2012:917540. doi:10.6064/2012/917540.

24 405 24. Toh H, Savoie CJ, Kamikawaji N, Muta S, Sasazuki T, Kuhara S. Changes at the floor of the  
26 406 peptide-binding groove induce a strong preference for proline at position 3 of the bound peptide:  
27 407 molecular dynamics simulations of HLA-A\*0217. *Biopolymers*. 2000;54(5):318-27.  
28 408 doi:10.1002/1097-0282(20001015)54:5<318::AID-BIP30>3.0.CO;2-T.

30 409 25. Apweiler R, Bairoch A, Wu CH, Barker WC, Boeckmann B, Ferro S et al. UniProt: the Universal  
31 410 Protein knowledgebase. *Nucleic acids research*. 2004;32(Database issue):D115-9.  
32 411 doi:10.1093/nar/gkh131.

34 412 26. Altschul SF, Gertz EM, Agarwala R, Schaffer AA, Yu YK. PSI-BLAST pseudocounts and the minimum  
35 413 description length principle. *Nucleic acids research*. 2009;37(3):815-24. doi:10.1093/nar/gkn981.

37 414 27. Styczynski MP, Jensen KL, Rigoutsos I, Stephanopoulos G. BLOSUM62 miscalculations improve  
38 415 search performance. *Nature biotechnology*. 2008;26(3):274-5. doi:10.1038/nbt0308-274.

40 416 28. Vita R, Overton JA, Greenbaum JA, Ponomarenko J, Clark JD, Cantrell JR et al. The immune epitope  
41 417 database (IEDB) 3.0. *Nucleic acids research*. 2015;43(Database issue):D405-12.  
42 418 doi:10.1093/nar/gku938.

44 419 29. Kim Y, Sidney J, Buus S, Sette A, Nielsen M, Peters B. Dataset size and composition impact the  
45 420 reliability of performance benchmarks for peptide-MHC binding predictions. *BMC bioinformatics*.  
46 421 2014;15:241. doi:10.1186/1471-2105-15-241.

48 422 30. Schuler MM, Nastke MD, Stevanovic S. SYFPEITHI: database for searching and T-cell epitope  
49 423 prediction. *Methods in molecular biology*. 2007;409:75-93.

51 424 31. Bhasin M, Singh H, Raghava GP. MHCBN: a comprehensive database of MHC binding and  
52 425 non-binding peptides. *Bioinformatics*. 2003;19(5):665-6.

54 426 32. Robinson J, Soormally AR, Hayhurst JD, Marsh SG. The IPD-IMGT/HLA Database - New  
55 427 developments in reporting HLA variation. *Human immunology*. 2016.  
56 428 doi:10.1016/j.humimm.2016.01.020.

58 429 33. Vigneron N, Stroobant V, Van den Eynde BJ, van der Bruggen P. Database of T cell-defined human  
59 430 tumor antigens: the 2013 update. *Cancer immunity*. 2013;13:15.

- 431 34. Wang K, Li M, Hakonarson H. ANNOVAR: functional annotation of genetic variants from  
432 high-throughput sequencing data. *Nucleic acids research*. 2010;38(16):e164. doi:10.1093/nar/gkq603.  
433 35. Boegel S, Lower M, Schafer M, Bukur T, de Graaf J, Boisguerin V et al. HLA typing from RNA-Seq  
434 sequence reads. *Genome medicine*. 2012;4(12):102. doi:10.1186/gm403.  
435 36. Hundal J, Carreno BM, Petti AA, Linette GP, Griffith OL, Mardis ER et al. pVAC-Seq: A  
436 genome-guided in silico approach to identifying tumor neoantigens. *Genome medicine*. 2016;8(1):11.  
437 doi:10.1186/s13073-016-0264-5.

438

## 439 **FIGURE LEGENDS**

440 **Figure 1** Heat map of HLA protein sequence similarity. The larger the Z-Score, the more similar of the  
441 pair HLA protein sequences. It showed high similarity between different types of HLA alleles within  
442 the same gene locus.

443 **Figure 2** Method of PSSMHCpan. The three mainly steps are shown in grey background.

444 **Figure 3** Evaluation on broad HLA allelic coverage. (a) The allele-specific prediction evaluation  
445 results showed by ROC curve of PSSMHCpan, NetMHC-4.0, NetMHCpan-3.0 and PickPocket. This  
446 result was except 9mer and 10mer of HLA-A\*0101, HLA-A\*0201 and HLA-B\*0702. The ACC,  
447 sensitivity and specificity at cutoff of 500nM were also shown. (b) The boxplot of individual ACC of  
448 particular HLA allele with fixed peptide length. Comparison between PSSMHCpan and other three  
449 methods were performed by using paired T test. “\*” denotes  $P < 0.05$  and “\*\*\*” denotes  $P < 0.01$ . (c) The  
450 evaluation results showed by ROC curve of PSSMHCpan in pan-specific prediction, NetMHCpan-3.0  
451 and PickPocket. The ACC, sensitivity and specificity at cutoff of 500nM were also shown. (d)  
452 Correlation analysis of peptide-HLA binding affinity result of IC50 value in log2 between  
453 allele-specific prediction and pan-specific prediction.

454 **Figure 4** The evaluation result of the independent dataset. We denoted  $IC_{50} < 500nM$  was positive  
455 prediction.

456 **Figure 5** Pan-cancer neoantigens. (a) The flow-chart of neoantigen prediction pipeline. Software with

1 457 parameters using in the pipeline are shown in dashed procedure. (b) The distribution of neoantigens  
2  
3 458 generated from each SNV across diverse cancers. (c) The distribution of neoantigens generated from  
4  
5  
6 459 each InDel across diverse cancers. (d) The distribution of neoantigen loads across 10 cancer types. The  
7  
8  
9 460 cancer types are sorted by median value of neoantigen loads. (e) The expression of HLA class I in  
10  
11 461 tumor and corresponding normal samples.  
12  
13  
14  
15  
16  
17  
18  
19  
20  
21  
22  
23  
24  
25  
26  
27  
28  
29  
30  
31  
32  
33  
34  
35  
36  
37  
38  
39  
40  
41  
42  
43  
44  
45  
46  
47  
48  
49  
50  
51  
52  
53  
54  
55  
56  
57  
58  
59  
60  
61  
62  
63  
64  
65

Figure  
0 4

HLA-A

HLA-B

HLA-C

Click here to download  
Figure Figure1.pdf

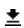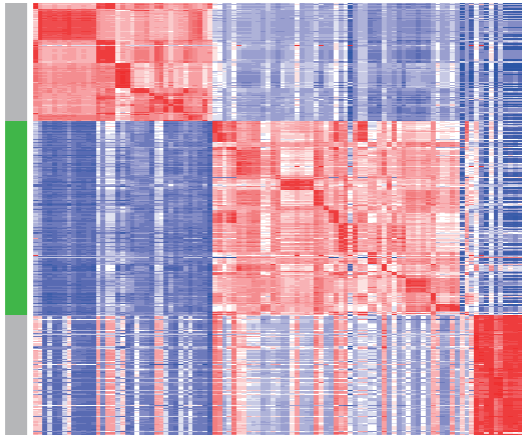

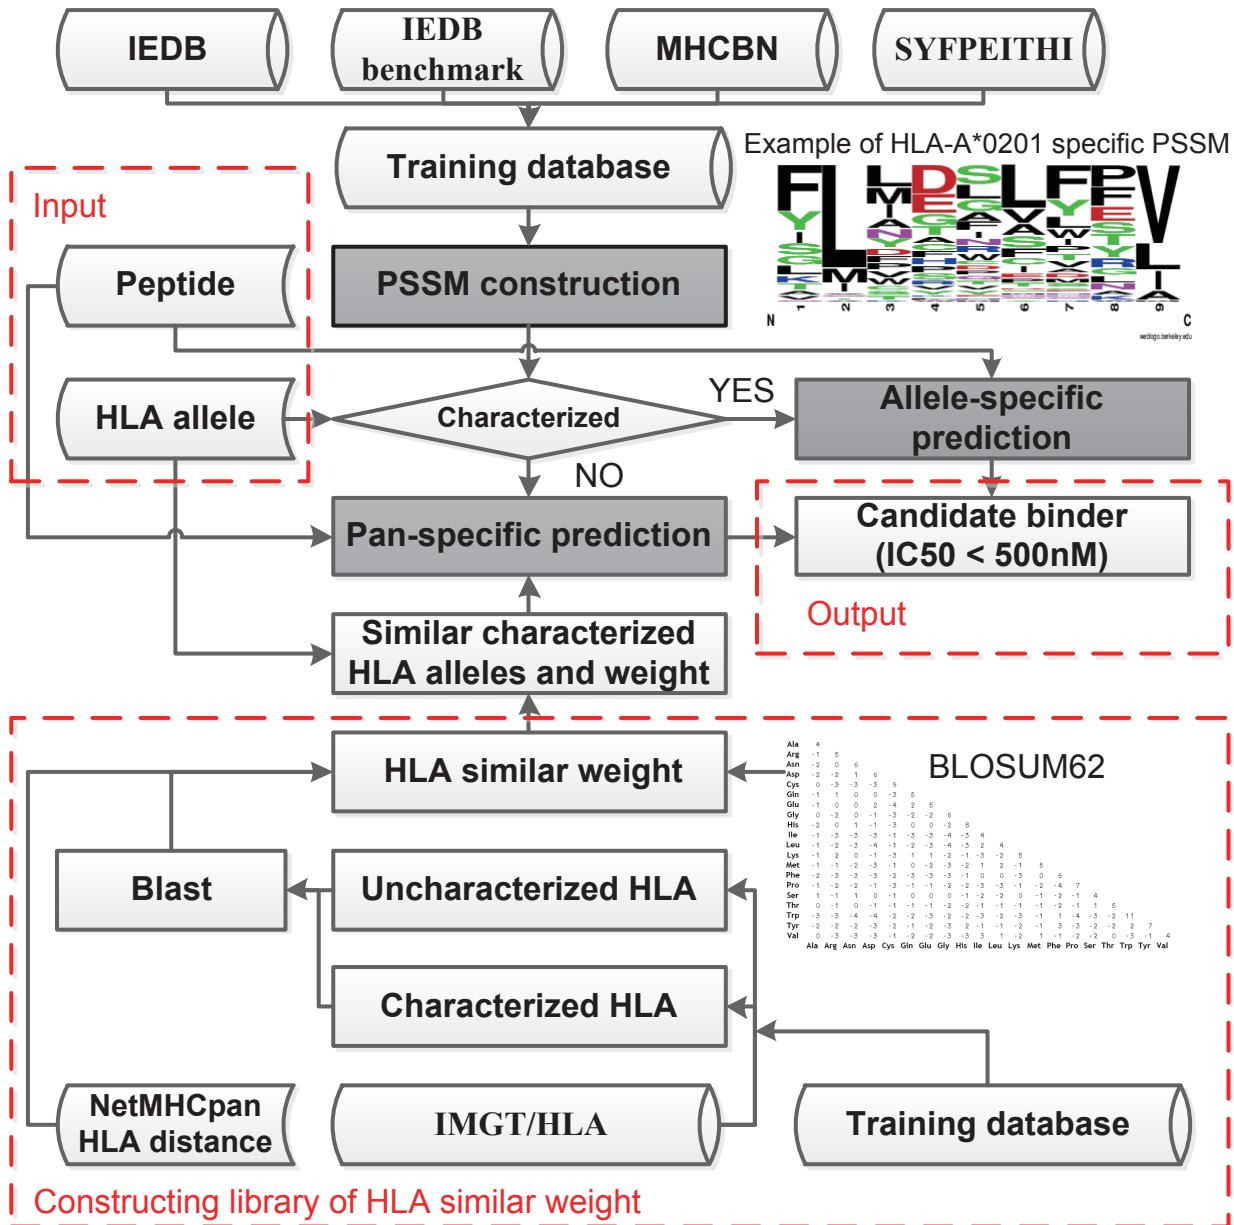

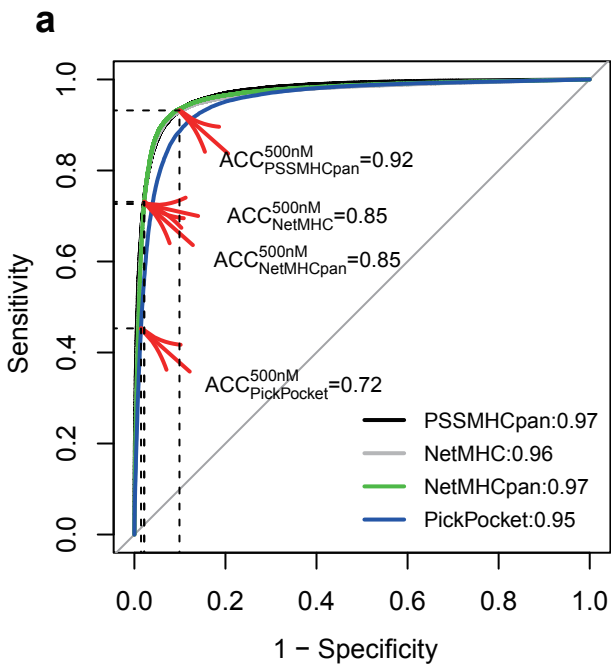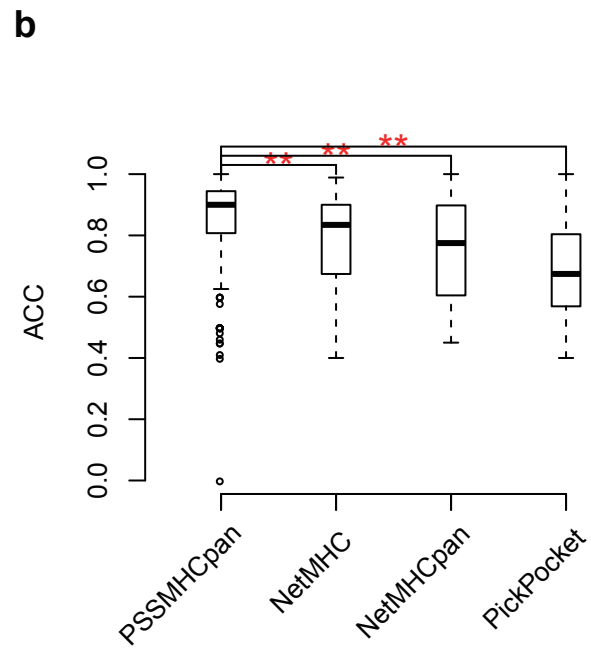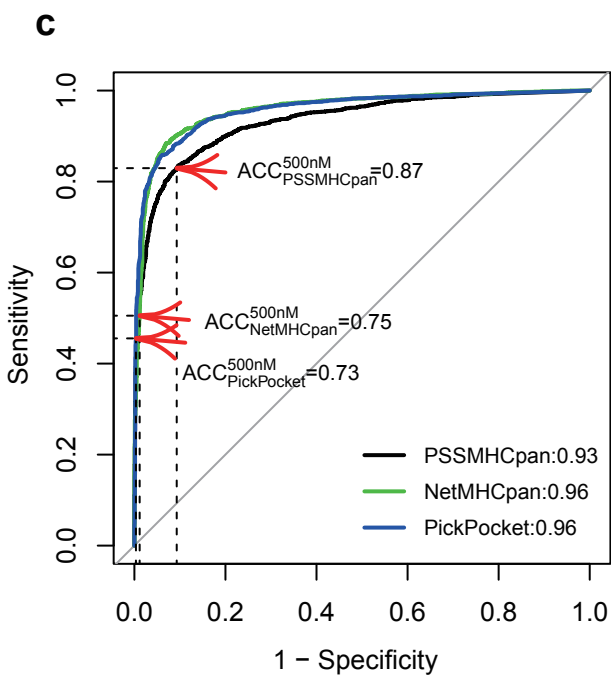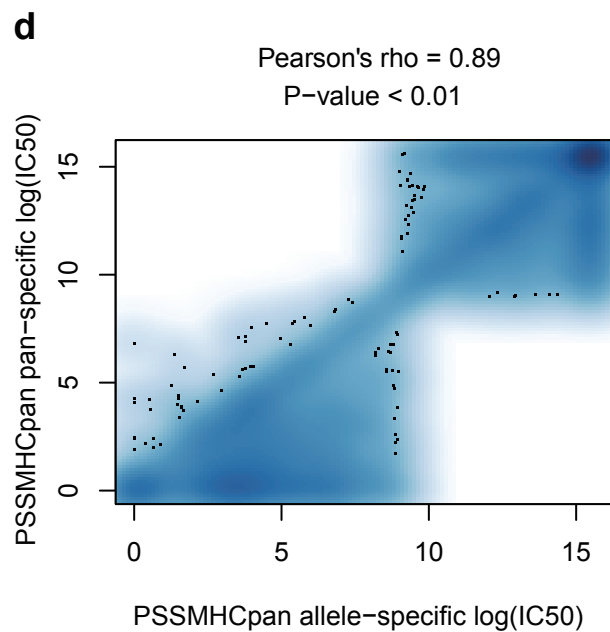

Figure

[Click here to download Figure Figure4.pdf](#)

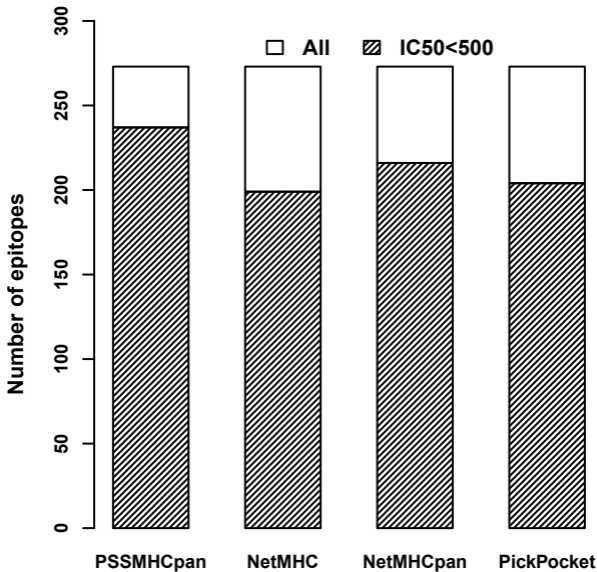



Figure

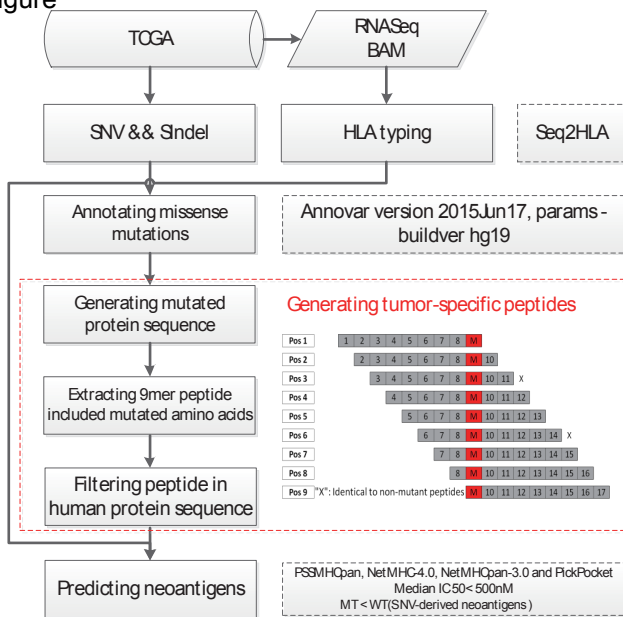b Click here to download [Figure 5.pdf](#)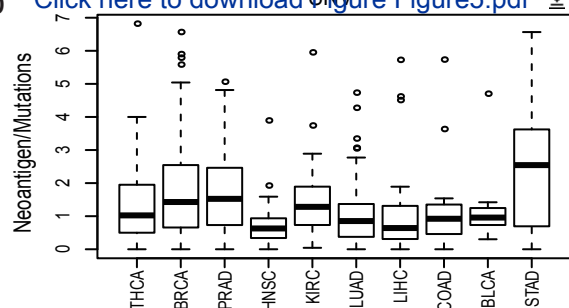

c

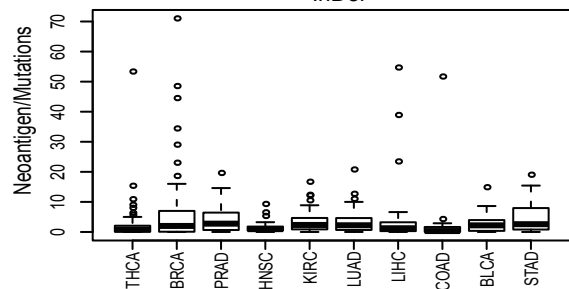

d

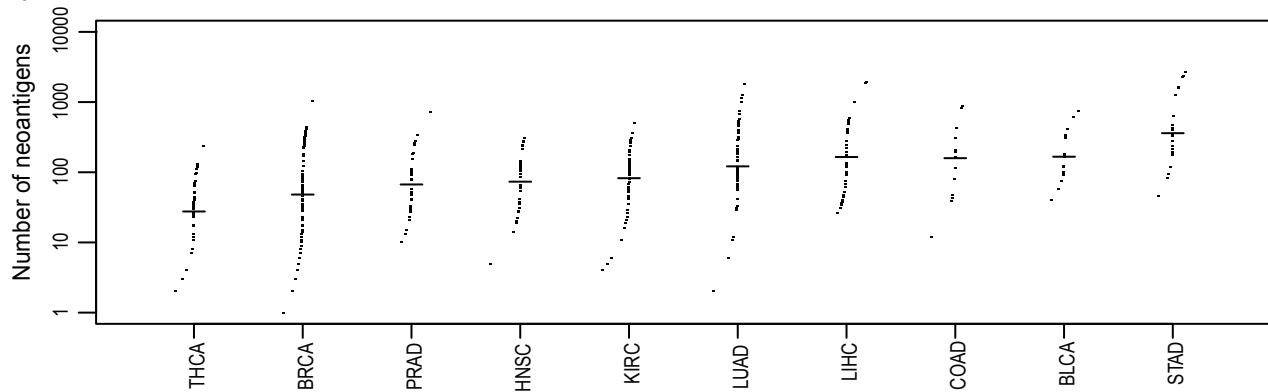

e

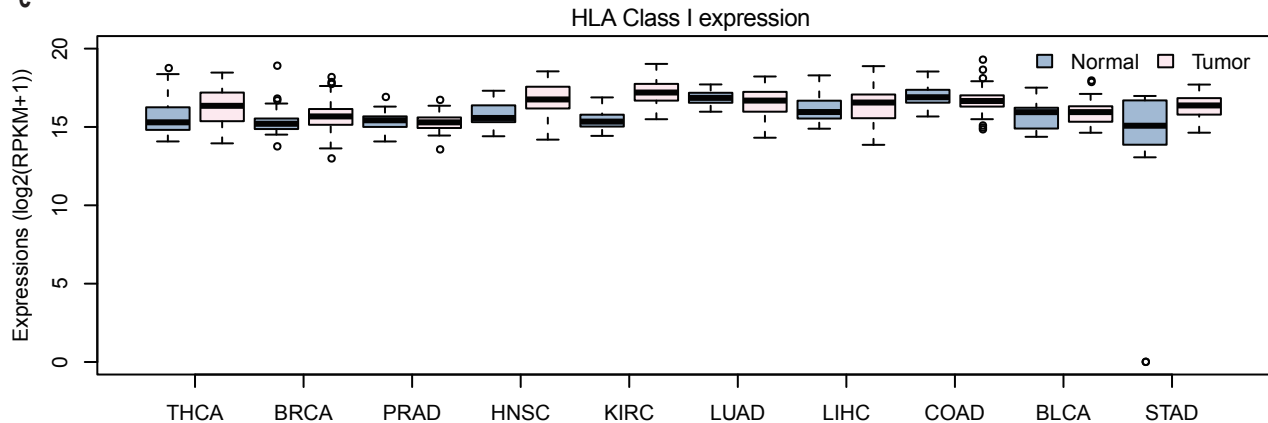

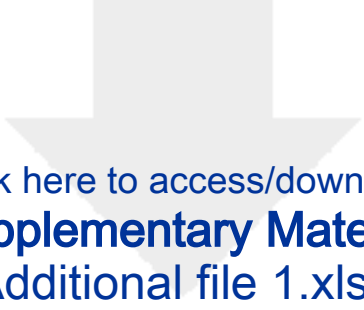

Click here to access/download  
**Supplementary Material**  
Additional file 1.xlsx



Supplement: gix017_GIGA-D-16-00055_Original_Submission.pdf [file gix017_GIGA-D-16-00055_Original_Submission.pdf]
