# Supplementary material for: PSSMHCpan: a novel PSSM-based software for predicting class I peptide-HLA binding affinity
Source: PubMed Central journal article supplement (PMC5467046; doi:10.1093/gigascience/gix017), 2017-03-15

# 1 PSSMHCpan: a novel PSSM based software for predicting class I 2 peptide-HLA binding affinity

3  
4 Geng Liu<sup>†1</sup>, Dongli Li<sup>†1</sup>, Si Qiu<sup>1,2</sup>, Wenhui Li<sup>1</sup>, Cheng-chi Chao<sup>1,3</sup>, Naibo Yang<sup>1,3</sup>, Handong Li<sup>1,3</sup>,  
5 Zhen Cheng<sup>4</sup>, Xin Song<sup>5</sup>, Le Cheng<sup>1,6</sup>, Jian Wang<sup>1,7</sup>, Huanming Yang<sup>1,7</sup>, Yong Hou<sup>\*1,8</sup>, Kun Ma<sup>\*1</sup>, Bo  
6 Li<sup>\*1,9</sup>

7 <sup>1</sup>BGI-Shenzhen, Shenzhen 518083 China

8 <sup>2</sup>BGI Education Center, University of Chinese Academy of Sciences, Shenzhen 518083, China

9 <sup>3</sup>Complete Genomics, Inc., 2071 Stierlin Court, Mountain View, CA 94043 USA

10 <sup>4</sup>Molecular Imaging Program at Stanford, Department of Radiology and Bio-X Program, Stanford  
11 University

12 <sup>5</sup>The third affiliated hospital of Kunming medical university (Tumor hospital of Yunnan province)

13 <sup>6</sup>BGI-Yunnan, Kunming 650000, China

14 <sup>7</sup>James D. Watson Institute of Genome Sciences, Hangzhou 310058, China

15 <sup>8</sup>Department of Biology, University of Copenhagen, Denmark

16 <sup>9</sup>BGI-Forensics, Shenzhen 518083, China

17 †These authors contributed equally to this work as first authors.

18 \*To whom correspondence should be addressed. Tel: (86) 18680679919; Fax: (86) 0755-25273620;

19 E-mail: [libo@genomics.cn](mailto:libo@genomics.cn) (Bo Li). Correspondence may also be addressed. E-mail:

20 [makun1@genomics.cn](mailto:makun1@genomics.cn) (Kun Ma) and [huyong@genomics.cn](mailto:huyong@genomics.cn) (Yong Hong).

## 21 Abstract

22  
23  
24  
25  
26  
27  
28  
29  
30  
31  
32  
33  
34  
35  
36  
37  
38  
39  
40  
41  
42  
43  
44  
45  
46  
47  
48  
49  
50  
51  
52  
53  
54  
55  
56  
57  
58  
59  
60  
61  
62  
63  
64  
65

23 **Background:** Predicting peptides binding affinity with human leukocyte antigen (HLA) is a crucial  
24 step in developing powerful antitumor vaccine for cancer immunotherapy. Currently available methods  
25 work quite well in predicting peptide binding affinity with HLA alleles such as HLA-A\*0201,  
26 HLA-A\*0101, and HLA-B\*0702 in terms of sensitivity and specificity. However, quite a few types of  
27 HLA alleles that are present in majority of human populations including HLA-A\*0202, HLA-A\*0203,  
28 HLA-A\*6802, HLA-B\*5101, HLA-B\*5301, HLA-B\*5401 and HLA-B\*5701 still cannot be predicted  
29 with satisfactory accuracy using currently available methods. Further, currently most popularly used  
30 methods for predicting peptides binding affinity are inefficient in identifying neoantigens from large  
31 quantity of whole genome and transcriptome sequencing data

32 **Result:** Here we present a Position Specific Scoring Matrix (PSSM) based software called  
33 PSSMHCpan to accurately and efficiently predict peptide binding affinity with a broad coverage of  
34 HLA class I alleles. We evaluated the performance of PSSMHCpan by analyzing 10-fold  
35 cross-validation on a training database containing 87 HLA alleles and obtained an average area under  
36 receiver operating characteristic curve (AUC) of 0.94 and accuracy ACC of 0.85. In an independent  
37 dataset (Peptide Database of Cancer Immunity) evaluation, PSSMHCpan is substantially better than  
38 popularly used NetMHC-4.0, NetMHCpan-3.0, PickPocket, Nebula, and SMM with a sensitivity of  
39 0.90, as compared to 0.74, 0.81, 0.77, 0.24 and 0.79. In addition, PSSMHCpan is more than 197 times  
40 faster than NetMHC-4.0, NetMHCpan-3.0, PickPocket, sNebula and SMM when predicting  
41 neoantigens from 661,263 peptides from a breast tumor sample. Finally, we built a neoantigen  
42 prediction pipeline and identified 117,017 neoantigens from 467 cancer samples of various cancers  
43 from TCGA.

44 **Conclusion:** PSSMHCpan is superior to currently available methods in predicting peptide binding  
45 affinity with a broad coverage of HLA class I alleles.

46 **Key words:** Antitumor vaccine, peptide-HLA binding affinity, PSSMHCpan, neoantigen.

## 48 **Background**

49 Cancer immunotherapy has been proved to be a promising strategy that enhances the strengths of the  
50 immune system of cancer patients to fight cancer in recent years. This strategy exploits the fact that

1 51 surface of cancer cells have a variety of tumor antigens (i.e. peptides of 8-13 residues in lengths)  
2  
3 52 coming from various kinds of mutated proteins cleaved by the proteasomes intracellular. These  
4  
5  
6 53 peptides are bound to HLA class I allelic specific molecules, forming peptide-HLA complexes which  
7  
8  
9 54 are presented to T cell receptors (TCRs). If TCRs can recognize these peptide-HLA complexes on the  
10  
11  
12 55 surface of cancer cells, cytotoxic T lymphocytes (CTLs) will destroy cancer cells. Cancer cells are  
13  
14 56 highly heterogeneous in terms of morphological, phenotypical and genetic profiles. Cancer cells of  
15  
16  
17 57 different tumors and within the same tumor could present hundreds of different types of peptides. The  
18  
19  
20 58 immune system of cancer patients could only recognize small populations of cancer cells. In order to  
21  
22  
23 59 enhance the power of the CTLs to recognize and eradicate as many cancer cells as possible, one  
24  
25  
26 60 strategy is to vaccinate cancer patients with complex antitumor peptides. The first step to develop  
27  
28  
29 61 powerful antitumor vaccines is to predict peptide binding affinity with HLA class I allele.  
30

31 62 In order to predict peptide binding affinity with HLA class I allele, four types of methods have been  
32  
33  
34 63 developed, including structure based methods, machine learning based methods, PSSM based methods  
35  
36  
37 64 [16] and combined methods. The structure based methods predict peptide binding affinity by  
38  
39  
40 65 calculating the minimum free energy of peptide-HLA complex [30], which allows us to understand the  
41  
42  
43 66 peptide-HLA binding affinity at the structure level. However, the predicting speed of this type of  
44  
45  
46 67 methods is extremely slow, and inaccurate due to limited number of available crystal structures [20].  
47  
48  
49 68 The machine learning based methods predict peptide binding affinity by learning a function that maps a  
50  
51  
52 69 given peptide to areas with binding affinity based on available known bound peptides (binders).  
53  
54  
55 70 Because machine learning based methods can accurately predict peptides with specific HLA alleles  
56  
57  
58 71 such as HLA-A\*0201, HLA-A\*0101, and HLA-B\*0702 [25, 41], they are frequently used in many  
59  
60  
61 72 studies [8, 37, 40]. Thus far, many machine learning based methods have been developed, including

1 73 support vector machine (SVM) based method MHC2PRED [15], hidden markov model (HMM) based  
2  
3 74 method S-HMM [26], artificial neural network (ANN) based method NetMHC [2, 17], and  
4  
5  
6 75 pan-specific method NetMHCpan [11, 23, 24]. Although currently available tools can predict a number  
7  
8  
9 76 of HLA class I allelic coverage with appreciable AUCs, they cannot predict quite a few types of HLA  
10  
11 77 alleles that are present in majority of human populations with satisfactory accuracy. For example,  
12  
13  
14 78 NetMHC, ARB, Nebula, sNebula and SMM only achieved the average predicted AUC of no more than  
15  
16  
17 79 0.85 when they were used in predicting HLA-A\*0202, HLA-A\*0203, HLA-A\*6802, HLA-B\*5101,  
18  
19  
20 80 HLA-B\*5301, HLA-B\*5401 and HLA-B\*5701 [19, 21, 27]. Further, these methods are inefficient in  
21  
22  
23 81 predicting large quantity of peptides generated from whole genome and transcriptome sequencing data  
24  
25  
26 82 because of their nonlinear computation complexity. In contrast, PSSM based methods predict peptide  
27  
28  
29 83 binding affinity by building a matrix from multiple peptides alignment that represent the motif  
30  
31  
32 84 information (i.e. the binding anchor). These methods can predict binding affinity fast because PSSM's  
33  
34  
35 85 linear computational complexity is much less complex than nonlinear computational complexity of  
36  
37  
38 86 structure-based and machine learning based methods. Based on the mechanism of PSSM, several  
39  
40  
41 87 software have been developed such as PickPocket [42], SVMHC [9] and nHLAPred [5]. However the  
42  
43  
44 88 predicting accuracy of these software is not as good as that of machine learning based methods [42].  
45  
46  
47 89 Recently, in order to predict peptide-HLA binding affinity more accurately, scientists from several  
48  
49  
50 90 groups combined different methods to develop new software including NetMHCcons [13] and IEDB  
51  
52  
53 91 (combination of machine learning and PSSM) [34], and HLaffy (combination of structure and PSSM)  
54  
55  
56 92 [22]. Although these combined methods indeed have shown a better predictive performance as  
57  
58  
59 93 compared to individual methods, their predictive accuracy are still not satisfactory, especially in  
60  
61  
62 94 clinical applications [4]. In order to develop more effective immunotherapy, it is necessary to develop

1 95 better software that can more accurately and efficiently predict peptide binding affinity with a broad  
2  
3 96 coverage of HLA class I alleles.  
4  
5

6 97 Here, we present a novel software called PSSMHCpan that can predict peptide binding affinity  
7  
8  
9 98 accurately and efficiently. We designed this software based on the PSSM mechanism and trained it with  
10  
11 99 a larger database containing 63,099 peptide-HLA pairs which allow us to allele-specifically predict  
12  
13  
14 100 peptide binding affinity with HLA class I allele. In order to predict peptide binding affinity with a  
15  
16  
17 101 broad coverage of HLA class I alleles, we induce a simple but powerful pan-specific prediction  
18  
19  
20 102 approach based on the similarity of HLA protein sequences. We show that PSSMHCpan can accurately  
21  
22  
23 103 and efficiently predict peptide binding affinity with a broad HLA class I allelic coverage of at least 87  
24  
25  
26 104 types in 10-fold cross-validation, and it performed better than other 5 software when evaluated with  
27  
28 105 Peptide Database of Cancer Immunity dataset. Finally, we built a prediction pipeline to identify  
29  
30  
31 106 neoantigens in 467 TCGA tumor samples across 10 types of cancers.  
32

33  
34 107

## 35 36 108 **Methods**

37  
38  
39 109 PSSM is represented as a motif of multiple sequence alignment result [39]. The basic principle of  
40  
41  
42 110 PSSMHCpan is that peptides that bind to a specific HLA allele possess the motif information that can  
43  
44  
45 111 be studied by PSSM. We propose the PSSMHCpan in two novel aspects. Firstly, we construct a  
46  
47  
48 112 comprehensive training database and build allele-specific PSSMs for predicting peptide binding  
49  
50  
51 113 affinity with characterized HLA class I allele (with binders in training database). Secondly, we use the  
52  
53  
54 114 similarity of HLA sequences to induce a simple but powerful pan-specific prediction approach based  
55  
56  
57 115 on our hypothesis below, and predict peptide binding affinity with uncharacterized HLA class I allele  
58  
59 116 (without binders in training database).  
60

1 117 It is well known that peptides on the cell surface are bound to the floor of the peptide-binding groove  
2  
3 118 that is in the central region of the  $\alpha 1/\alpha 2$  heterodimer (a molecule composed of two non-identical  
4  
5  
6 119 subunits) of HLA protein sequences [33]. By analyzing the sequences of HLA proteins, we noticed that  
7  
8  
9 120 HLA protein sequences are highly similar among different HLA alleles (Figure 1), suggesting that  
10  
11 121 peptides bound to similar HLA alleles have similar binding affinity according to predictive value of  
12  
13  
14 122 IC50. Thereby, we hypothesize that since different HLA protein sequences are similar, the peptide  
15  
16  
17 123 binding affinity with different HLA alleles should be similar too. Based on this hypothesis and the  
18  
19  
20 124 PSSM mechanism, we design the software PSSMHCPan as following three steps: PSSM construction,  
21  
22  
23 125 allele-specific prediction, and pan-specific prediction. The flowchart of PSSMHCPan is shown in  
24  
25 126 Figure 2.

27  
28 127

### 30 128 **PSSM construction**

31  
32  
33  
34 129 We define PSSM as a matrix of M rows (Amino acid; M=20) and N columns (Length; N=8~25). Each  
35  
36 130 element  $P_{ai}$  in the matrix is the likelihood of a given character (amino acid) at its position. We  
37  
38  
39 131 calculate the element  $P_{ai}$  through the following function,

40  
41  
42 132 
$$P_{ai} = \log \frac{F_{ai} + \omega}{BG_a}$$

43  
44  
45 133 Where  $F_{ai}$  denotes the frequency of amino acid  $a$  at position  $i$  from the training database;  $BG_a$   
46  
47 134 denotes the background frequency of amino acid  $a$  from UniProt database [3]; and  $\omega$  is a random  
48  
49  
50 135 value (ranging from 0 to 1) generated from Dirichlet distribution [1].

51  
52  
53 136

### 54 55 137 **Allele-specific prediction**

56  
57  
58 138 To qualitatively predict peptide binding affinity with characterized HLA allele, we define a

139 *binding\_score* as the sum of the corresponding values of each amino acid of a given peptide at each  
140 position in the corresponding allele-specific PSSM.

$$141 \quad \text{binding\_score} = \frac{\sum_{i=1}^N P_{ai}}{N}$$

142 We consider a peptide with *binding\_score* > 0 as a binder according to the signal prediction of  
143 GeneID [10]. The higher *binding\_score* that a peptide has, the higher binding affinity this peptide  
144 would have.

145 We convert a *binding\_score* into an IC50 value as follows:

$$146 \quad \text{IC50} = 50000^{\frac{\text{Max} - \text{binding\_score}}{\text{Max} - \text{Min}}}$$

147 Where Max and Min denote the maximum and the minimum values of *binding\_score*, respectively.

148 In this study, we assigned Max as 0.8 and Min as -0.8 based on our experience. According to the  
149 recommendation of IEDB [43], we consider a peptide with *IC50* < 500nM as a binder and a peptide  
150 with *IC50* < 50nM as a strong binder.

151

## 152 **Pan-specific prediction**

153 Firstly, we construct a library of HLA similar weight (Button panel in Figure 2) that contains pairs of  
154 characterized and uncharacterized HLA alleles, and each pair has a weight value. We determine a pair  
155 of characterized and uncharacterized HLA alleles by using BLOSUM62 [32] based BLAST alignment  
156 of HLA protein sequences, and assign the alignment score as the weight value. We also extracted the  
157 nearest distance of HLA alleles from NetMHCpan-3.0 [23] as a pair of characterized and  
158 uncharacterized HLA alleles and assigned a constant as the weight value.

159 Secondly, we qualitatively predict the binding affinity of a given peptide with uncharacterized HLA  
160 allele with an *IC50<sub>min</sub>* value which is calculated as below:

$$IC50_{un} = \frac{\sum_{i=1}^S w_i * IC50_i}{\sum_{i=1}^S w_i}$$

161  
162 Where  $S$  denotes the sum of characterized HLA alleles that pair up the specific uncharacterized  
163 HLA allele according to the library of HLA similar weight.  $w_i$  and  $IC50_i$  denote the weight value  
164 and the allele-specific prediction result of peptide binding affinity with HLA allele  $i$ . We also consider a  
165 peptide with  $IC50_{un} < 500nM$  as a binder, and a peptide with  $IC50_{un} < 50nM$  as a strong binder.

### 167 **10-fold cross-validation**

168 We apply 10-fold cross-validation [4] to evaluate the performance of peptide-HLA binding prediction  
169 as follows. Firstly, we randomly partitioned our collected data (See Data Description) into 10 subsets of  
170 nearly equal size, of which each consists of equal number of binders and non-binders. All the binders  
171 are experimentally verified, while the non-binders include experimentally verified ones from IEDB  
172 benchmark [14] and computer randomly constructed ones predicted as non-binders by any of the  
173 following four methods (PSSMHCpan, NetMHC-4.0, NetMHCpan-3.0 and PickPocket). We use  
174 computer constructed non-binders because currently available experimentally verified non-binders that  
175 meet our requirement only cover 50 class I HLA alleles. Subsequently, we performed 10 iterations of  
176 training and validation. In each iteration we use a different subset of data for validation, while the  
177 remaining 9 subsets for training.

### 179 **Data Description**

180 We collected our training database of HLA class I binders from the following resources: the Immune  
181 Epitope Database and Analysis Resource (IEDB) [36], IEDB benchmark [14], SYFPEITHI [31],  
182 MHCBN [6], and in-house experimental epitopes. After filtering out duplications and peptides with



1 183 abnormal amino acids which do not or rarely exist naturally, such as B, J, O, U, X and Z, we obtained  
2  
3 184 64,677 peptide-HLA pairs that cover 162 HLA alleles (Table 1). We only selected HLA alleles that  
4  
5  
6 185 consist of at least 10 binders with a fixed length. Finally, we built 241 PSSMs for allele-specific  
7  
8  
9 186 prediction of peptides with variable lengths (8~25 peptides) bound to 123 HLA class I alleles  
10  
11  
12 187 (Additional file 1: Table S1).

14 188 **Table 1** Summary of training database.

| Database           | IEDB   | IEDB<br>benchmark | SYFPEITHI | MHCBN | Combined | Training<br>database |
|--------------------|--------|-------------------|-----------|-------|----------|----------------------|
| <b>HLA alleles</b> | 166    | 95                | 109       | 103   | 162      | 123                  |
| <b>Binders</b>     | 54,272 | 40,930            | 3,329     | 4,070 | 64,677   | 63,099               |

25 189 We collected 64 uncharacterized HLA class I alleles that cannot be predicted with NetMHC-4.0 but  
26  
27  
28 190 can be predicted with NetMHCpan-3.0. We extracted 2064 binders that bind to the 64 uncharacterized  
29  
30  
31 191 HLA alleles from our training database and same number of experimentally verified non-binders as a  
32  
33  
34 192 Dataset for Pan-specific evaluation (DP).

35  
36 193 To construct a library of HLA weight similarity, we collected 690,497 pairs of characterized and  
37  
38  
39 194 uncharacterized HLA class I alleles from 13,957 HLA protein sequences in IMGT/HLA (Release  
40  
41  
42 195 3.23.0) [29], and 2800 pairs from the nearest distance of HLA alleles in NetMHCpan-3.0, respectively.  
43  
44  
45 196 After removing duplications, we retained 691,031 pairs for pan-specific prediction of peptide binding  
46  
47  
48 197 affinity with 4,896 HLA class I alleles (Additional file 1: Table S1).

49  
50 198 We also collected an independent dataset of binders from the Peptide Database of Cancer Immunity  
51  
52  
53 199 [35]. From this database, we selected 285 binders that cover 38 HLA alleles of HLA-A, HLA-B,  
54  
55  
56 200 HLA-C. After removing duplications, we retained 273 binders for validation.

57  
58  
59 201 To detect pan-cancer neoantigens, we obtained somatic mutations from 467 TCGA tumor samples

202 across 10 cancer types (Table 2) from GDC data portal (<https://gdc-portal.nci.nih.gov/>), and the RSEM  
 203 gene expression data in these tumors and in their paired normal tissues from FireBrowse  
 204 (<http://firebrowse.org/>). In addition, we also obtained the RNASeq aligned bam files from these tumors  
 205 from dbGAP.

206  
 207 **Table 2 Summary of 467 cancer samples from TCGA cohort.**

| Cancer type | Patient # | Cancer type | Patient # |
|-------------|-----------|-------------|-----------|
| BLCA        | 19        | LIHC        | 47        |
| BRCA        | 93        | LUAD        | 57        |
| COAD        | 16        | PRAD        | 43        |
| HNSC        | 39        | STAD        | 28        |
| KIRC        | 67        | THCA        | 58        |

208  
 209 **Analyses**

210 **Evaluation of peptide binding affinity prediction with a broad HLA class I allelic coverage**

211 In order to evaluate the allele-specific prediction accuracy of PSSMHCpan with a broad HLA class I  
 212 allelic coverage, we performed 10-fold cross-validation on training data of 87 HLA class I alleles that  
 213 contain at least 12 binders, and obtained an average AUC of 0.94 and prediction accuracy ACC (ACC =  
 214  $\frac{TP+TN}{TP+FP+TN+FN}$ , where TP, FP, TN and FN, represent true-positive, false-positive, true-negative and  
 215 false-negative) of 0.85 under a cutoff of 500nM. We then used the same validation data to evaluate 6  
 216 popularly used software, i.e. NetMHC-4.0, NetMHCpan-3.0, PickPocket, Nebula [18], sNebula [19],  
 217 and SMM [28], respectively. It is worth noting that the training data of these 6 software are from IEDB,  
 218 IEDB benchmark, MHCBN, SYFPEITHI and so on [2, 18, 19, 23, 28, 42], which are largely

219 overlapped (over 65%) with the validation data in our 10-fold cross-validation analysis. Despite this  
 220 substantial overlap (which will biasedly increase the AUC values for these software), we found that the  
 221 AUC values of our PSSMHCpan are nearly equal or slightly lower than those of NetMHC-4.0,  
 222 NetMHCpan-3.0, PickPocket and SMM, but nearly equal or higher than those of Nebula and sNebula  
 223 (Figure 3a; Additional file 1: Table S2). By comparing the ACC of each HLA allele with fixed peptide  
 224 length among the 7 software, we found that the median ACC of PSSMHCpan is significantly larger  
 225 than other software ( $P < 0.05$ , Paired T test; Figure 3b).

**Table 3** Assessments (AUC values) of peptide binding affinity prediction with specific HLA alleles and  
 peptide length by PSSMHpan, NetMHC, NetMHpan, PickPocket, Nebula, sNebula and SMM.

| HLA    | Length | PSSMHCpan | NetMHC* | NetMHCpan* | PickPocket* | Nebula* | sNebula* | SMM* |
|--------|--------|-----------|---------|------------|-------------|---------|----------|------|
| A*0101 | 9      | 0.96      | 0.98    | 0.98       | 0.94        | 0.82    | 0.97     | 0.97 |
| A*0101 | 10     | 0.94      | 0.98    | 0.97       | 0.94        | 0.69    | 0.96     | 0.98 |
| A*0201 | 9      | 0.93      | 0.94    | 0.94       | 0.94        | 0.88    | 0.93     | 0.94 |
| A*0201 | 10     | 0.96      | 0.96    | 0.97       | 0.96        | 0.94    | 0.97     | 0.96 |
| B*0702 | 9      | 0.95      | 0.97    | 0.97       | 0.96        | 0.81    | 0.95     | 0.97 |
| B*0702 | 10     | 0.94      | 0.98    | 0.97       | 0.96        | 0.80    | 0.93     | 0.98 |
| A*0202 | 9      | 0.96      | 0.99    | 0.99       | 0.97        | 0.53    | 0.89     | 0.98 |
| A*0203 | 9      | 0.97      | 0.98    | 0.99       | 0.98        | 0.85    | 0.97     | 0.98 |
| A*0203 | 10     | 0.95      | 0.98    | 0.98       | 0.95        | 0.53    | 0.96     | 0.97 |
| A*6802 | 9      | 0.93      | 0.98    | 0.98       | 0.95        | 0.80    | 0.95     | 0.97 |
| A*6802 | 10     | 0.91      | 0.96    | 0.96       | 0.92        | 0.78    | 0.97     | 0.97 |
| B*5101 | 10     | 0.82      | 0.89    | 0.90       | 0.87        | 0.72    | 0.96     | 0.89 |
| B*5301 | 9      | 0.93      | 0.98    | 0.98       | 0.96        | 0.55    | 0.88     | 0.98 |
| B*5301 | 10     | 0.91      | 0.97    | 0.95       | 0.92        | 0.69    | 0.91     | 0.97 |
| B*5401 | 9      | 0.91      | 0.98    | 0.97       | 0.95        | 0.51    | 0.89     | 0.98 |
| B*5401 | 10     | 0.87      | 0.97    | 0.97       | 0.96        | 0.53    | 0.88     | 0.99 |
| B*5701 | 9      | 0.98      | 0.99    | 0.99       | 0.98        | 0.94    | 0.99     | 0.99 |

\*Training data are substantially overlapped with validation data.

229 Considering a one-time 10-fold cross-validation of randomly selection and non-binders construction  
 230 might produce biased results, we repeated another five times of 10-fold cross-validation, and found that  
 231 the standard deviations (SD) of AUCs are  $\leq 0.0001$ , indicating no bias in the 10-fold cross-validation  
 232 (Table 4).

**Table 4** The AUC and SD values in 5 times 10-fold cross-validation.

| Time      | 1      | 2      | 3      | 4      | 5      | SD     |
|-----------|--------|--------|--------|--------|--------|--------|
| PSSMHCpan | 0.9405 | 0.9405 | 0.9408 | 0.9405 | 0.9406 | 0.0001 |

234 To evaluate pan-specific prediction of PSSMHCpan, we removed peptides in DP dataset (See Date  
235 Description) from our training data and retrained PSSMHCpan. We then predicted those peptides with  
236 PSSMHCpan, and obtained an AUC of 0.92 and an ACC of 0.86. We also predicted those peptides with  
237 NetMHCpan-3.0 and PickPocket, which gave AUC values of 0.95 and ACC values of 0.75 and 0.73,  
238 respectively. It is worth noting that the peptides that we predicted with PSSMHCpan, NetMHCpan-3.0  
239 and PickPocket are removed from our training data, but included in the training data of  
240 NetMHCpan-3.0 and PickPocket.

241 In order to evaluate the pan-specificity of PSSMHCpan, we compared the allele-specific prediction  
242 with pan-specific prediction of 3,408 correctly predicted peptides. We observed a high correlation  
243 between allele-specific and pan-specific prediction (Pearson' rho=0.89,  $P<0.01$ ; Figure 3d), suggesting  
244 that our PSSMHCpan can quantitatively predict peptide-HLA binding affinity with profound accuracy.

245 Mukherjee et al (2016) recently published a peptide binding affinity prediction software HLaffy that  
246 was evaluated with peptides from MHCBN and correctly detected 1179 out of 1323 binders (Table 5).  
247 To compare the performance of our PSSMHCpan with that of HLaffy, we removed the peptides in  
248 MHCBN from our training database and retrained our PSSMHCpan with the remaining peptides.  
249 Because non-binders are much less than binders in MHCBN, we only used the binders in MHCBN to  
250 evaluate and calculated the prediction accuracy by sensitivity ( $\text{Sen} = \frac{TP}{TP+FP}$ ). We found that our  
251 PSSMHCpan correctly identified 1309 out of 1323 binders (Table 5).

252 **Table 5** Comparison of PSSMHCpan with HLaffy. The prediction of HLaffy was performed on  
253 webserver (<http://proline.biochem.iisc.ernet.in/HLaffy/>).

| Allele     | PSSMHCpan   | HLaffy |
|------------|-------------|--------|
| HLA-A*0201 | <b>1.00</b> | 0.92   |
| HLA-A*0203 | <b>1.00</b> | 0.93   |
| HLA-A*0206 | <b>1.00</b> | 0.93   |
| HLA-A*0301 | <b>1.00</b> | 0.84   |
| HLA-A*1101 | <b>1.00</b> | 0.96   |
| HLA-A*2402 | <b>1.00</b> | 0.77   |
| HLA-A*3301 | <b>1.00</b> | 0.83   |
| HLA-A*6801 | <b>1.00</b> | 0.94   |
| HLA-A*6802 | <b>0.95</b> | 0.73   |
| HLA-B*0702 | <b>1.00</b> | 0.88   |

|            |             |      |
|------------|-------------|------|
| HLA-B*3501 | <b>0.99</b> | 0.89 |
| HLA-B*5301 | <b>1.00</b> | 0.92 |
| HLA-B*5401 | <b>1.00</b> | 0.88 |
| All        | <b>0.99</b> | 0.90 |

254

255 **Evaluation of peptide binding affinity prediction with an independent dataset**

256 Considering cross-validation might overestimate prediction accuracy, we reevaluated PSSMHCpan,  
 257 NetMHC-4.0, NetMHCpan-3.0, PickPocket, Nebula, sNebula and SMM with an independent dataset  
 258 that contains 273 non-duplicated experimentally verified binders from the Peptide Database of Cancer  
 259 Immunity. We firstly removed 238 out of 273 binders as they are included in our training data, and then  
 260 retrained the PSSMHCpan with the remaining training data. Together, we identified 268 of 273 (0.98)  
 261 binders with 7 software. Of the 268 binders identified, PSSMHCpan and sNebula identified (245 and  
 262 253) substantially more binders than other 5 software did (Figure 4; Additional file 1: Table S4).

263

264 **Evaluation of the peptide binding affinity prediction efficiency**

265 As whole genome sequencing (WGS) and whole exome sequencing (WES) of cancer genome data are  
 266 rapidly increasing, there is an urgent need to develop software that can quickly identify neoantigens  
 267 from cancer genome data. To compare the efficiency of PSSMHCpan, NetMHC-4.0, NetMHCpan-3.0,  
 268 PickPocket, Nebula, sNebula and SMM, we first calculated the predicting speed of 10-fold  
 269 cross-validation on training database with 87 HLA class I alleles and found that PSSMHCpan is much  
 270 faster than other six (ranging from 1.7 to 291.9 times faster; Table 6). We then used each software to  
 271 independently predict binding affinity of 661,263 peptides generated from a breast tumor sample that  
 272 contains 3062 somatic mutations with 6 HLA class I alleles. We found that PSSMHCpan completed the  
 273 analysis in about 6 seconds. In contrast, NetMHC-4.0, took 3.61 hours, NetMHCpan-3.0 took 28.63

274 hours, PickPocket took 1.34 hours, sNebula took 0.35 hours and SMM took 1.49 hours to complete the  
 275 analysis. Apparently, PSSMHCpan is far more efficient than other methods in detecting neoantigens  
 276 from large quantity of sequencing data.

277 **Table 6** The predicting speed (CPU time) of the seven software. The fastest ones were marked in bold.

| Methods              | 10-fold cross-validation | Breast tumour neoantigens prediction |
|----------------------|--------------------------|--------------------------------------|
| <b>PSSMHCpan</b>     | <b>18.40s</b>            | <b>6.34s</b>                         |
| <b>NetMHC-4.0</b>    | 1056.83s                 | 13001.57s                            |
| <b>NetMHCpan-3.0</b> | 5371.16s                 | 103060.24s                           |
| <b>PickPocket</b>    | 282.83s                  | 4839.63s                             |
| <b>Nebula</b>        | 146.70s                  | Not done                             |
| <b>sNebula</b>       | 31.04s                   | 1245.88s                             |
| <b>SMM</b>           | 222.45s                  | 5369.36s                             |

278 CPU time was measured by second (s).

279

280 **Pan-cancer neoantigens**

281 To identify neoantigens that can be used as candidate markers to develop antitumor vaccine, we  
 282 develop a neoantigen prediction pipeline to determine what types of mutated peptides in cancer cells  
 283 could be brought to the cell surface by HLAs based on somatic small mutations (SSMs). In order to  
 284 maximize prediction accuracy, we include PSSMHCpan, NetMHC-4.0, NetMHCpan-3.0 and  
 285 PickPocket into our pipeline to detect neoantigens in TCGA tumor samples as following (Figure 5a).  
 286 We first annotate missense SSMs including single nucleotide variants (SNVs), insertions and deletions  
 287 (InDels) with ANNOVAR [38] to create a list of tumor-specific peptides (8-13) with an in-house script.

1 288 After HLA alleles are predicted with Seq2HLA [7], we predict neoantigens with PSSMHCpan,  
2  
3 289 NetMHC-4.0, NetMHCpan-3.0 and PickPocket, respectively. Finally, we select a list of candidate  
4  
5  
6 290 neoantigens that meet the following conditions: 1) Predicting as binders ( $IC_{50} < 500nM$ ) by at least 2  
7  
8  
9 291 software and taking the median value of  $IC_{50}$  as final result; 2) The  $IC_{50}$  value of a given SNV-derived  
10  
11  
12 292 neoantigen must be smaller than that of its corresponding wild type (WT) peptide [12]. Using this  
13  
14  
15 293 pipeline, we analyzed the neoantigens across 10 cancer types from TCGA cohort.

16  
17 294 Totally we identified candidate 117,017 neoantigens from 467 TCGA cancer samples. We calculated  
18  
19  
20 295 the number of candidate neoantigens per SSM in different types of cancer and observed that STAD,  
21  
22  
23 296 PRAD and BRCA had the highest neoantigens with 2.54, 1.52 and 1.43 per SNV, respectively (Figure  
24  
25  
26 297 5b), whereas the highest neoantigens per InDel were 2.76, 2.59 and 2.34 in PRAD, STAD and KIRC,  
27  
28  
29 298 respectively (Figure 5c). We also compared the neoantigen loads (number of candidate neoantigens per  
30  
31  
32 299 sample) across 10 cancer types and found that STAD, COAD and BLCA tumors had the highest  
33  
34  
35 300 neoantigen loads with median values of 302, 182 and 163, while the THCA tumors had a lowest  
36  
37  
38 301 median neoantigen load of 30 (Figure 5d).

39 302 On average we identified 251 candidate neoantigens in each tumor. We then investigated whether the  
40  
41  
42 303 expression level of HLA class I would be increased in cancer cells to bind neoantigens. Indeed, by  
43  
44  
45 304 looking at the mRNA expression in 467 TCGA tumor samples and their paired normal tissues, we  
46  
47  
48 305 found that the expression of HLA class I was markedly elevated in most tumors (Figure 5e). Since the  
49  
50  
51 306 amount of candidate neoantigens differs substantially among different tumors, we examined whether  
52  
53  
54 307 the number of candidate neoantigens was correlated with HLA class I expression level in each tumor.  
55  
56  
57 308 However, we found no correlation between the number of candidate neoantigens and the HLA class I  
58  
59  
60 309 expression levels in tumors (Pearson'  $\rho = -0.05$ ,  $P = 0.33$ ).

1  
2  
3  
4  
5  
6  
7  
8  
9  
10  
11  
12  
13  
14  
15  
16  
17  
18  
19  
20  
21  
22  
23  
24  
25  
26  
27  
28  
29  
30  
31  
32  
33  
34  
35  
36  
37  
38  
39  
40  
41  
42  
43  
44  
45  
46  
47  
48  
49  
50  
51  
52  
53  
54  
55  
56  
57  
58  
59  
60  
61  
62  
63  
64  
65

310

311 **Discussion**

312 Designing antitumor vaccine requires predicting peptide-HLA binding affinity with high accuracy. In  
313 this article, we have presented a novel software PSSMHCpan that allows us to predict peptide binding  
314 affinity with a broad coverage of HLA class I alleles. By comparing our PSSMHCpan with  
315 NetMHC-4.0, NetMHCpan-3.0, PickPocket, Nebula, sNebula and SMM, we demonstrate that overall  
316 our PSSMHCpan is at least as good as the other six in predicting peptide-HLA binding affinity in terms  
317 of accuracy, and PSSMHCpan is far more efficient in detecting neoantigens from large quantity of  
318 sequencing data.

319 In recent years, PSSM based methods to predict peptide-HLA binding affinity were gradually  
320 replaced by machine learning based methods that are believed to have reliable accuracy and larger data  
321 prediction capability [20]. However, by comparing our PSSMHCpan with machine learning based  
322 methods NetMHC-4.0 and NetMHCpan-3.0, we show that our PSSMHCpan exhibits a higher  
323 predicting accuracy than NetMHC-4.0 and NetMHCpan-3.0 as evidenced by the independent dataset  
324 evaluation. In terms of data prediction capability, PSSMHCpan can allele-specifically and  
325 pan-specifically predict peptides that bind to 241 and 4778 HLA class I alleles, respectively. While  
326 NetMHC-4.0 and NetMHCpan-3.0 can only predict 89 and 2924 HLA class I alleles, respectively.  
327 Furthermore, the PSSMHCpan displays more than 2050 and 16255 times higher prediction efficiency  
328 as compared to NetMHC-4.0 and NetMHCpan-3.0 (Table 6).

329 Practically, we noticed that the size of training database appeared to directly affect the prediction  
330 accuracy. We believe that a larger training database could have improved the prediction accuracy of  
331 PSSMHCpan. For instance, the PSSMHCpan prediction accuracy ACC in predicting 9mer peptides



1 332 bind to HLA-A\*0101 and HLA-B\*5703 are 0.96 and 0.70. Not surprisingly, there are 813 binders for  
2  
3 333 HLA-A\*0101 and only 25 binders for HLA-B\*5703, respectively in our training data.  
4  
5

6 334 It is worth noting that PSSMs with less training binders may contain more zero elements (i.e. amino  
7  
8  
9 335 acid "X" was never observed at position "Y"), which is represent as random omega in the formula of  
10  
11 336 "PSSM construction" that could affect the prediction accuracy. We investigated what training binder  
12  
13  
14 337 sizes have less random omega in PSSMs, and how training binder sizes could affect prediction  
15  
16  
17 338 accuracy. There are 6,784 9mer peptides bound to HLA-A\*0201 in our training database. We randomly  
18  
19  
20 339 selected 678 (10%) binders from the 6,784 9mer peptides for predicting. We then repeatedly predicted  
21  
22  
23 340 peptide binding affinity of the same 678 binders with PSSMHCPan respectively trained with increasing  
24  
25  
26 341 sizes of binders with an increment step of 10, randomly selected from the remaining 6,104 binders. We  
27  
28  
29 342 found that the prediction accuracy was increased as the training sizes increased, and the prediction  
30  
31  
32 343 accuracy reaches a plateau when the sizes of training binders are over 100 (Additional file 1: Table S5).  
33  
34 344 This suggests that PSSMHCPan trained with over 100 binders would contain fewer random omegas  
35  
36  
37 345 and have stable prediction accuracy. There are less 100 training binders in 145 out of 241 PSSMs in our  
38  
39  
40 346 PSSMHCPan. In our 10-fold cross-validation, PSSMs with less than 100 training binders could have  
41  
42  
43 347 increased or decreased AUCs, with a mean value of 0.88 (ranging from 0.5 to 1). In the case of the  
44  
45  
46 348 independent dataset evaluation, 3 out of 273 binders are incorrectly predicted due to PSSMs with less  
47  
48  
49 349 than 100 training binders.

50 350 Based on the evaluation results (Figure 4), we recognized that none of the available software is  
51  
52  
53 351 perfect and that in order to maximize the peptide binding affinity prediction accuracy, it is necessary to  
54  
55  
56 352 use multiple software. We believe that in order to provide actionable neoantigens that can be used in  
57  
58  
59 353 cancer immunotherapy, it requires more efforts to validate the function and immunogenicity of the  
60

1 354 predicted neoantigens experimentally.

2  
3 355 In conclusion, our PSSMHCpan can predict peptide binding affinity with a broad coverage of HLA  
4  
5  
6 356 class I alleles accurately and far more efficiently compared with currently most popular peptide binding  
7  
8  
9 357 affinity prediction software. Our PSSMHCpan can not only help develop personalized antitumor  
10  
11  
12 358 vaccines, but also has great potentials in other aspects of cancer immunotherapy including designing  
13  
14 359 dendritic cell (DC) vaccines, inducing DC-CTL, TCR-T, and assessing the PD-1/CTLA4 prognosis.  
15  
16

17 360

18  
19  
20 361 **Availability and requirements**

- 21  
22 362 ● Project name: PSSMHCpan
- 23  
24  
25 363 ● Project home page: <https://github.com/BGI2016/PSSMHCpan>
- 26  
27  
28 364 ● Operating system: Platform independent
- 29  
30  
31 365 ● Programming language: Perl
- 32  
33  
34 366 ● Other requirements: ActivePerl 5.8
- 35  
36  
37 367 ● License: OSI

38  
39 368

40  
41  
42 369 **Availability of supporting data and materials**

43  
44  
45 370 The supporting data from this study will be hosted in the additional files and PSSMHCpan home page.

46  
47 371

48  
49  
50 372 **Additional file**

51  
52  
53 373 Additional file 1: Supplementary tables for supporting the analysis part

54  
55  
56 374 Table S1 is the list of HLA class I alleles and corresponding peptide length for allele-specific and  
57  
58 375 pan-specific prediction. Table S2 is 10-fold cross-validation results of alleles-specific prediction of

1 376 PSSMHCpan, and the same validation on NetMHC, NetMHCpan, PickPocket, Nebula, sNebula and  
2  
3 377 SMM. Table S3 is the pan-specific prediction results. Table S4 is prediction results the independent  
4  
5  
6 378 dataset. Table S5 is the Validation results of 9mer peptides bound to HLA-A\*0201. The first column of  
7  
8  
9 379 "size of training database" represents the number of binder in training PSSMs.

10  
11 380

12  
13 381 **Competing interests**

14  
15 382 The authors declare no competing financial interests.

16  
17  
18 383

19  
20  
21 384 **Authors' contributions**

22  
23 385 G. L., D. L., B. L., Y. H., J. W. and H. Y. conceived of study and designed the project. G. L. and D. L.  
24  
25 386 performed software development, computational analyses and prepared figures. S. Q., W. L. performed  
26  
27 387 pan-cancer neoantigen analysis. G. L., B. L. and K. M. wrote the manuscript. All authors read and  
28  
29 388 approved the final manuscript

30  
31 389

32  
33 390 **Acknowledgements**

34  
35 391 We thank L. Goodman and M Dean for their constructive advices on the manuscript. We also thank Lei  
36  
37 392 Ge and Yan Liang for their administrative supports. We would like to thank The Cancer Genome Atlas  
38  
39 393 (TCGA), International Cancer Genome Consortium (ICGC), and Chinese Cancer Genome Consortium  
40  
41 394 (CCGC) for letting us using the sequencing data. This project was supported financially with funds  
42  
43 395 from the Shenzhen Science and Technology Program (JCYJ20150629114130814), the Shenzhen  
44  
45 396 Municipal Government of China (KQCX20150330171652450), the National Key Research and  
46  
47 397 Development Program: Precision Medical Research (2016YFC0900503, P.R. China) and application of  
48  
49 398 genomic technology based early diagnosis and treatment of Qujing Xuanwei lung cancer (2016RA037,  
50  
51 399 Yunan province, P.R. China)

52  
53 400

54  
55 401 **Reference**

56  
57  
58 402 1. Altschul SF, Gertz EM, Agarwala R et al. (2009) PSI-BLAST pseudocounts and the minimum  
59 403 description length principle. *Nucleic acids research* 37:815-824

1 404 2. Andreatta M, Nielsen M (2016) Gapped sequence alignment using artificial neural networks:  
2 405 application to the MHC class I system. *Bioinformatics* 32:511-517  
3 406 3. Apweiler R, Bairoch A, Wu CH et al. (2004) UniProt: the Universal Protein knowledgebase.  
4 407 *Nucleic acids research* 32:D115-119  
5 408 4. Backert L, Kohlbacher O (2015) Immunoinformatics and epitope prediction in the age of  
6 409 genomic medicine. *Genome medicine* 7:119  
7 410 5. Bhasin M, Raghava GP (2007) A hybrid approach for predicting promiscuous MHC class I  
8 411 restricted T cell epitopes. *Journal of biosciences* 32:31-42  
9 412 6. Bhasin M, Singh H, Raghava GP (2003) MHCBN: a comprehensive database of MHC binding  
10 413 and non-binding peptides. *Bioinformatics* 19:665-666  
11 414 7. Boegel S, Lower M, Schafer M et al. (2012) HLA typing from RNA-Seq sequence reads.  
12 415 *Genome medicine* 4:102  
13 416 8. Carreno BM, Magrini V, Becker-Hapak M et al. (2015) Cancer immunotherapy. A dendritic cell  
14 417 vaccine increases the breadth and diversity of melanoma neoantigen-specific T cells. *Science*  
15 418 348:803-808  
16 419 9. Donnes P, Kohlbacher O (2006) SVMHC: a server for prediction of MHC-binding peptides.  
17 420 *Nucleic acids research* 34:W194-197  
18 421 10. Guigo R, Knudsen S, Drake N et al. (1992) Prediction of gene structure. *Journal of molecular*  
19 422 *biology* 226:141-157  
20 423 11. Hoof I, Peters B, Sidney J et al. (2009) NetMHCpan, a method for MHC class I binding  
21 424 prediction beyond humans. *Immunogenetics* 61:1-13  
22 425 12. Hundal J, Carreno BM, Petti AA et al. (2016) pVAC-Seq: A genome-guided in silico approach to  
23 426 identifying tumor neoantigens. *Genome medicine* 8:11  
24 427 13. Karosiene E, Lundegaard C, Lund O et al. (2012) NetMHCcons: a consensus method for the  
25 428 major histocompatibility complex class I predictions. *Immunogenetics* 64:177-186  
26 429 14. Kim Y, Sidney J, Buus S et al. (2014) Dataset size and composition impact the reliability of  
27 430 performance benchmarks for peptide-MHC binding predictions. *BMC bioinformatics* 15:241  
28 431 15. Lata S, Bhasin M, Raghava GP (2007) Application of machine learning techniques in predicting  
29 432 MHC binders. *Methods in molecular biology* 409:201-215  
30 433 16. Liao WW, Arthur JW (2011) Predicting peptide binding to Major Histocompatibility Complex  
31 434 molecules. *Autoimmunity reviews* 10:469-473  
32 435 17. Lundegaard C, Lund O, Nielsen M (2011) Prediction of epitopes using neural network based  
33 436 methods. *Journal of immunological methods* 374:26-34  
34 437 18. Luo H, Ye H, Ng H et al. (2015) Understanding and predicting binding between human  
35 438 leukocyte antigens (HLAs) and peptides by network analysis. *BMC bioinformatics* 16 Suppl  
36 439 13:S9  
37 440 19. Luo H, Ye H, Ng HW et al. (2016) sNebula, a network-based algorithm to predict binding  
38 441 between human leukocyte antigens and peptides. *Scientific reports* 6:32115  
39 442 20. Luo H, Ye H, Ng HW et al. (2015) Machine Learning Methods for Predicting HLA-Peptide  
40 443 Binding Activity. *Bioinformatics and biology insights* 9:21-29  
41 444 21. Meydan C, Otu HH, Sezerman OU (2013) Prediction of peptides binding to MHC class I and II  
42 445 alleles by temporal motif mining. *BMC bioinformatics* 14 Suppl 2:S13  
43 446 22. Mukherjee S, Bhattacharyya C, Chandra N (2016) HLaffy: estimating peptide affinities for  
44 447 Class-1 HLA molecules by learning position-specific pair potentials. *Bioinformatics*

1 448 23. Nielsen M, Andreatta M (2016) NetMHCpan-3.0; improved prediction of binding to MHC class  
2 449 I molecules integrating information from multiple receptor and peptide length datasets.  
3 450 Genome medicine 8:33  
4 451 24. Nielsen M, Lundegaard C, Blicher T et al. (2007) NetMHCpan, a method for quantitative  
5 452 predictions of peptide binding to any HLA-A and -B locus protein of known sequence. PLoS  
6 453 one 2:e796  
7 454 25. Nielsen M, Lundegaard C, Worning P et al. (2003) Reliable prediction of T-cell epitopes using  
8 455 neural networks with novel sequence representations. Protein science : a publication of the  
9 456 Protein Society 12:1007-1017  
10 457 26. Noguchi H, Kato R, Hanai T et al. (2002) Hidden Markov model-based prediction of antigenic  
11 458 peptides that interact with MHC class II molecules. Journal of bioscience and bioengineering  
12 459 94:264-270  
13 460 27. Peters B, Bui HH, Frankild S et al. (2006) A community resource benchmarking predictions of  
14 461 peptide binding to MHC-I molecules. PLoS Comput Biol 2:e65  
15 462 28. Peters B, Sette A (2005) Generating quantitative models describing the sequence specificity  
16 463 of biological processes with the stabilized matrix method. BMC bioinformatics 6:132  
17 464 29. Robinson J, Soormally AR, Hayhurst JD et al. (2016) The IPD-IMGT/HLA Database - New  
18 465 developments in reporting HLA variation. Human immunology  
19 466 30. Schueler-Furman O, Altuvia Y, Sette A et al. (2000) Structure-based prediction of binding  
20 467 peptides to MHC class I molecules: application to a broad range of MHC alleles. Protein  
21 468 science : a publication of the Protein Society 9:1838-1846  
22 469 31. Schuler MM, Nastke MD, Stevanovic S (2007) SYFPEITHI: database for searching and T-cell  
23 470 epitope prediction. Methods in molecular biology 409:75-93  
24 471 32. Styczynski MP, Jensen KL, Rigoutsos I et al. (2008) BLOSUM62 miscalculations improve search  
25 472 performance. Nature biotechnology 26:274-275  
26 473 33. Toh H, Savoie CJ, Kamikawaji N et al. (2000) Changes at the floor of the peptide-binding  
27 474 groove induce a strong preference for proline at position 3 of the bound peptide: molecular  
28 475 dynamics simulations of HLA-A\*0217. Biopolymers 54:318-327  
29 476 34. Trolle T, Metushi IG, Greenbaum JA et al. (2015) Automated benchmarking of peptide-MHC  
30 477 class I binding predictions. Bioinformatics 31:2174-2181  
31 478 35. Vigneron N, Stroobant V, Van Den Eynde BJ et al. (2013) Database of T cell-defined human  
32 479 tumor antigens: the 2013 update. Cancer immunity 13:15  
33 480 36. Vita R, Overton JA, Greenbaum JA et al. (2015) The immune epitope database (IEDB) 3.0.  
34 481 Nucleic acids research 43:D405-412  
35 482 37. Walter S, Weinschenk T, Stenzl A et al. (2012) Multi-peptide immune response to cancer  
36 483 vaccine IMA901 after single-dose cyclophosphamide associates with longer patient survival.  
37 484 Nature medicine 18:1254-1261  
38 485 38. Wang K, Li M, Hakonarson H (2010) ANNOVAR: functional annotation of genetic variants from  
39 486 high-throughput sequencing data. Nucleic acids research 38:e164  
40 487 39. Xia X (2012) Position weight matrix, gibbs sampler, and the associated significance tests in  
41 488 motif characterization and prediction. Scientifica 2012:917540  
42 489 40. Yadav M, Jhunjhunwala S, Phung QT et al. (2014) Predicting immunogenic tumour mutations  
43 490 by combining mass spectrometry and exome sequencing. Nature 515:572-576  
44 491 41. Zhang GL, Ansari HR, Bradley P et al. (2011) Machine learning competition in immunology -  
45  
46  
47  
48  
49  
50  
51  
52  
53  
54  
55  
56  
57  
58  
59  
60  
61 21  
62  
63  
64  
65

492 Prediction of HLA class I binding peptides. Journal of immunological methods 374:1-4  
 493 42. Zhang H, Lund O, Nielsen M (2009) The PickPocket method for predicting binding specificities  
 494 for receptors based on receptor pocket similarities: application to MHC-peptide binding.  
 495 Bioinformatics 25:1293-1299  
 496 43. Zhang Q, Wang P, Kim Y et al. (2008) Immune epitope database analysis resource (IEDB-AR).  
 497 Nucleic acids research 36:W513-518

498  
 499 **FIGURE LEGENDS**

500 **Figure 1** Heat map of HLA protein sequence similarity. The larger the Z-Score, the more similar of the  
 501 pair HLA protein sequences. It showed high similarity between different types of HLA alleles within  
 502 the same gene locus.

503 **Figure 2** Method of PSSMHCpan. The three mainly steps are shown in grey background.

504 **Figure 3** Evaluation on broad HLA allelic coverage. (a) The allele-specific prediction evaluation  
 505 results showed AUC and ACC value of PSSMHCpan, and also compare to NetMHC-4.0,  
 506 NetMHCpan-3.0, PickPocket, Nebula, sNebula and SMM. (b) The boxplot of individual ACC of  
 507 particular HLA allele with fixed peptide length. Comparison between PSSMHCpan and other six  
 508 methods were performed by using paired T test. “\*” denotes  $P < 0.05$  and “\*\*\*” denotes  $P < 0.01$ . (c) The  
 509 evaluation results showed by ROC curve of PSSMHCpan in pan-specific prediction, NetMHCpan-3.0  
 510 and PickPocket. The ACC, sensitivity and specificity at cutoff of 500nM were also shown. (d)  
 511 Correlation analysis of peptide-HLA binding affinity result of IC50 value in log2 between  
 512 allele-specific prediction and pan-specific prediction.

513 **Figure 4** The evaluation result of the independent dataset. We denoted  $IC_{50} < 500nM$  as binder in  
 514 PSSMHCpan, NetMHC, NetMHCpan, PickPocket and SMM. In Nebula prediction,  $value \geq 1.5$  as  
 515 binder. In sNebula prediction,  $value \geq 0$  as binder.

516 **Figure 5** Pan-cancer neoantigens. (a) The flow-chart of neoantigen prediction pipeline. Software with

1 517 parameters using in the pipeline are shown in dashed procedure. (b) The distribution of neoantigens  
2  
3 518 generated from each SNV across diverse cancers. (c) The distribution of neoantigens generated from  
4  
5  
6 519 each InDel across diverse cancers. (d) The distribution of neoantigen loads across 10 cancer types. The  
7  
8  
9 520 cancer types are sorted by median value of neoantigen loads. (e) The expression of HLA class I in  
10  
11  
12 521 tumor and corresponding normal samples.  
13  
14  
15  
16  
17  
18  
19  
20  
21  
22  
23  
24  
25  
26  
27  
28  
29  
30  
31  
32  
33  
34  
35  
36  
37  
38  
39  
40  
41  
42  
43  
44  
45  
46  
47  
48  
49  
50  
51  
52  
53  
54  
55  
56  
57  
58  
59  
60  
61  
62  
63  
64  
65

Figure  
0 4

HLA-A

HLA-B

HLA-C

Click here to download  
Figure Figure1.pdf

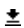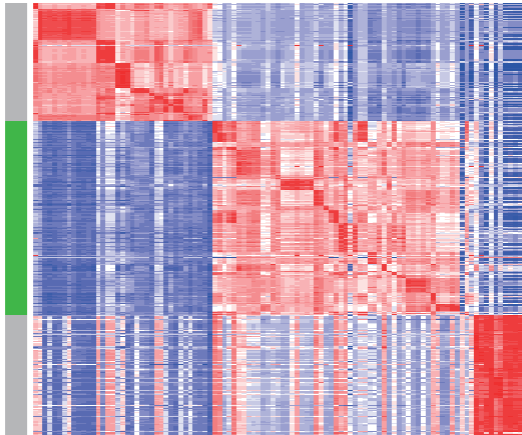



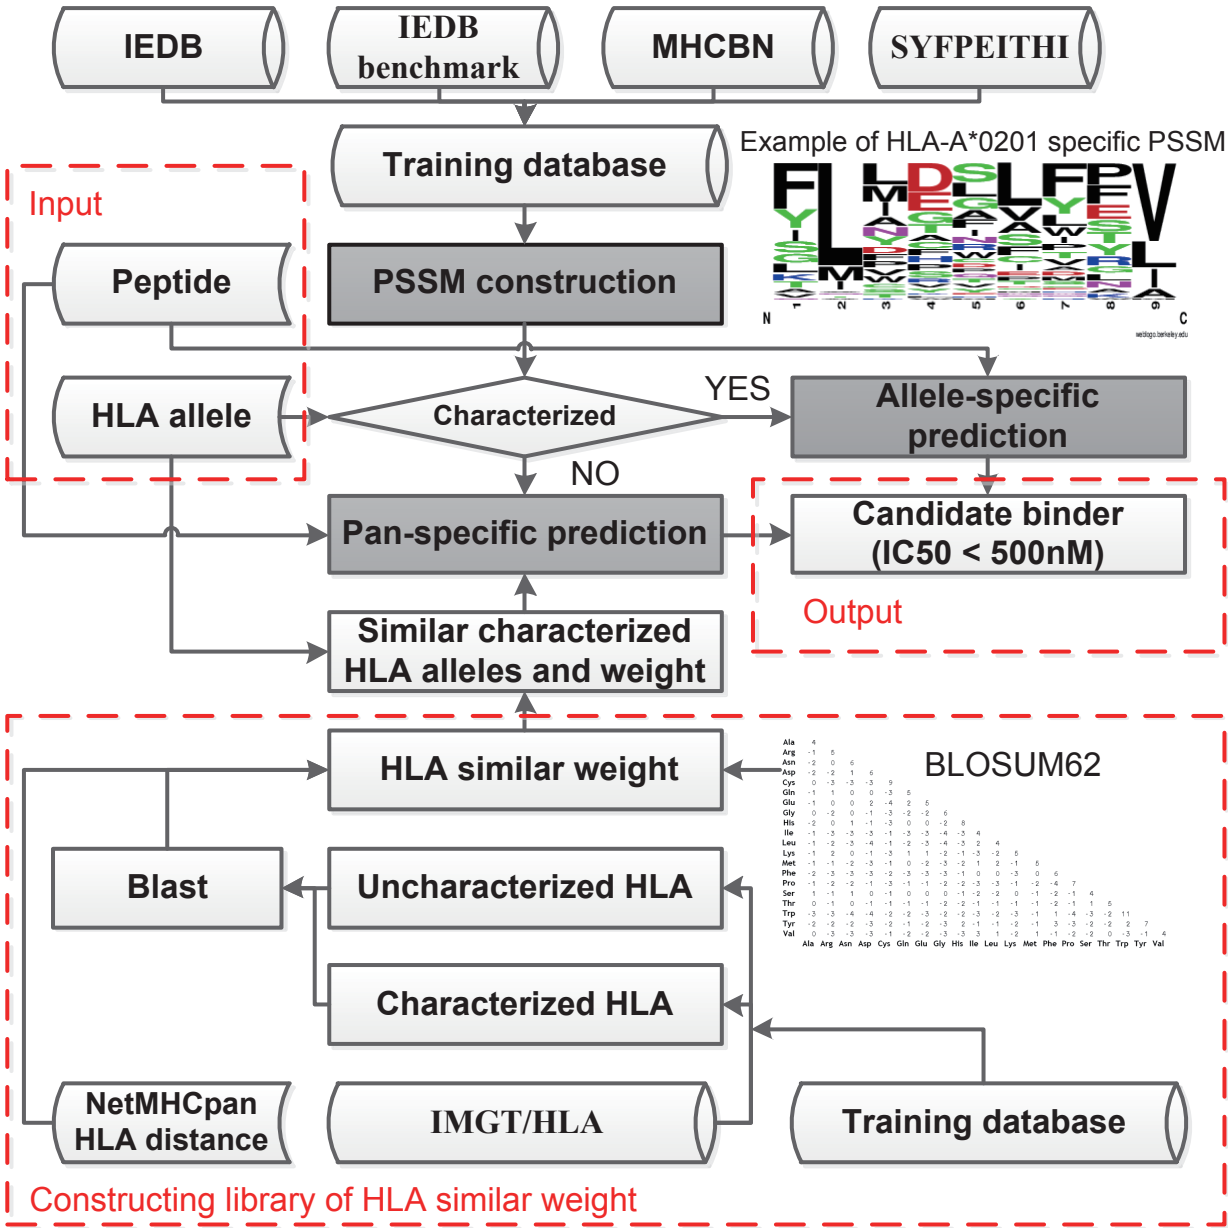

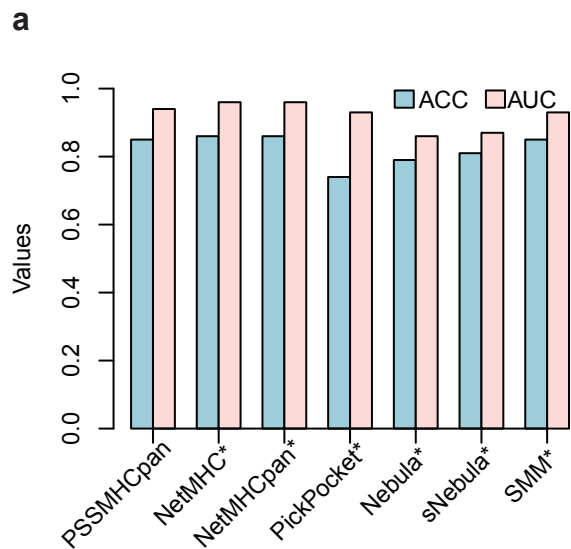

\*Training data for prediction tool software are known to substantially overlap with testing data.

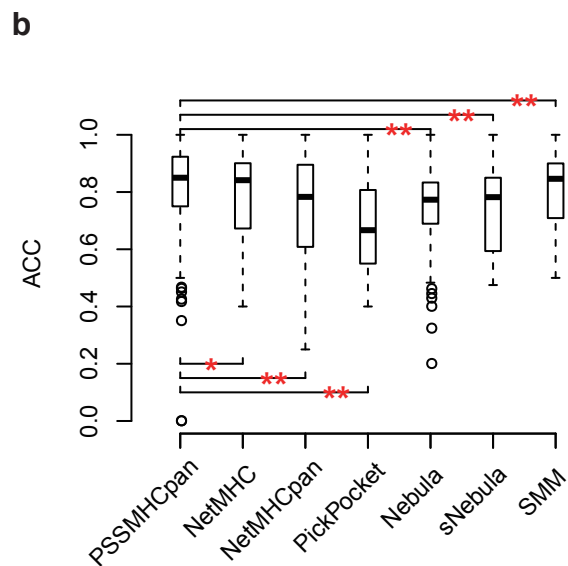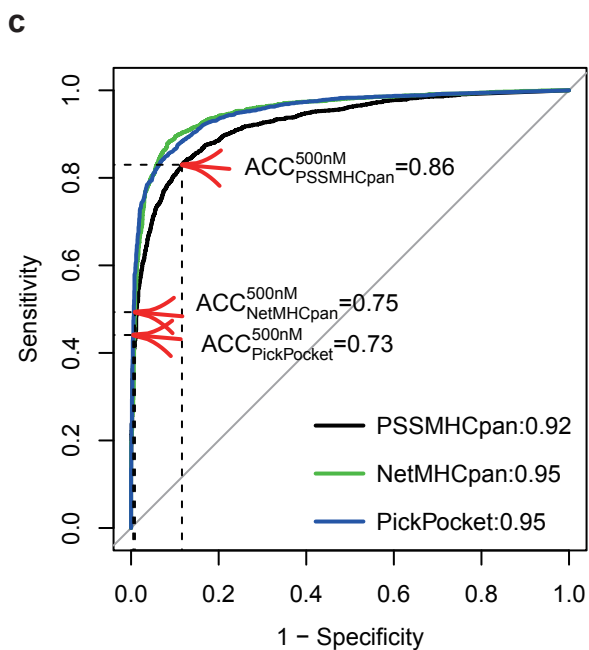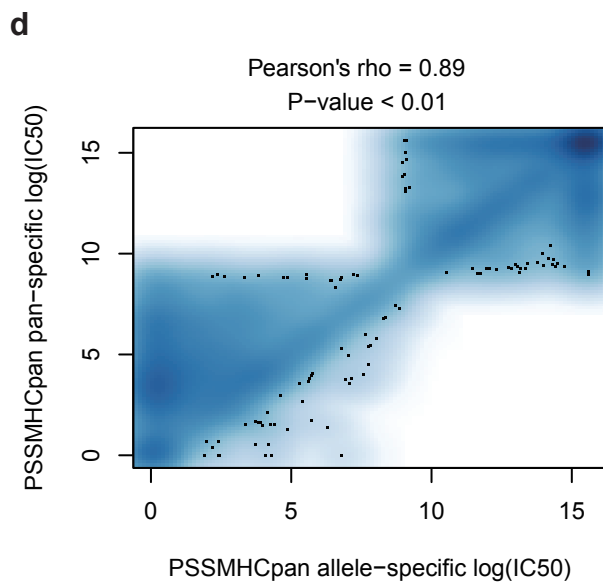

# Figure

[Click here to download Figure Figure4.pdf](#)

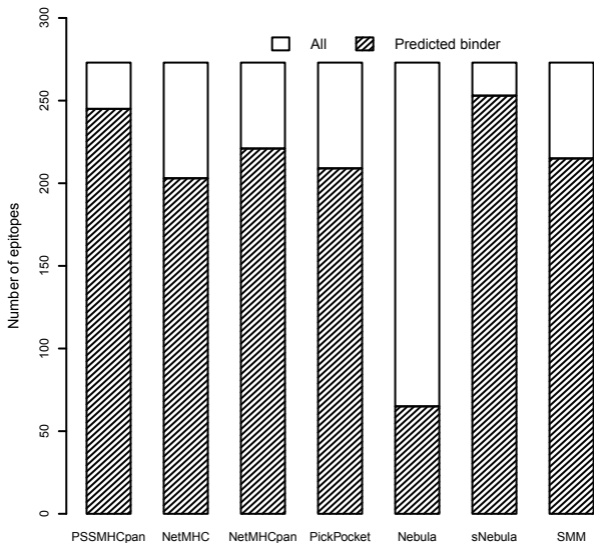

**Figure**

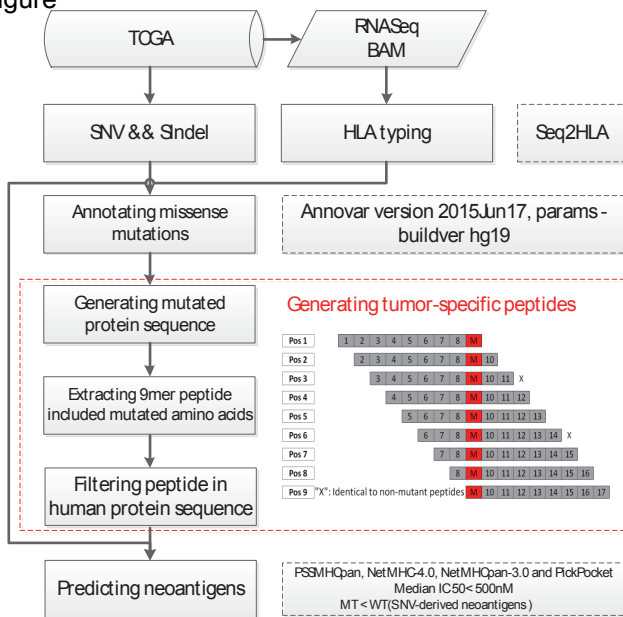

**b** [Click here to download Figure 5.pdf](#)

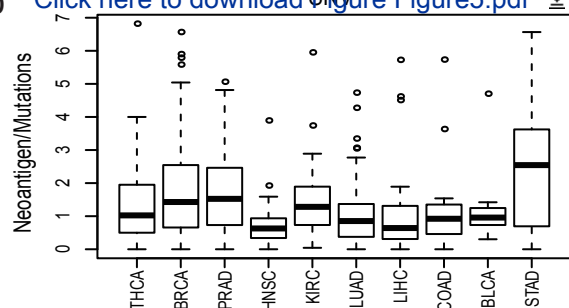

**c**

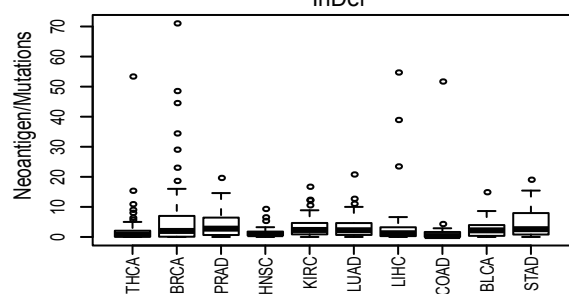

**d**

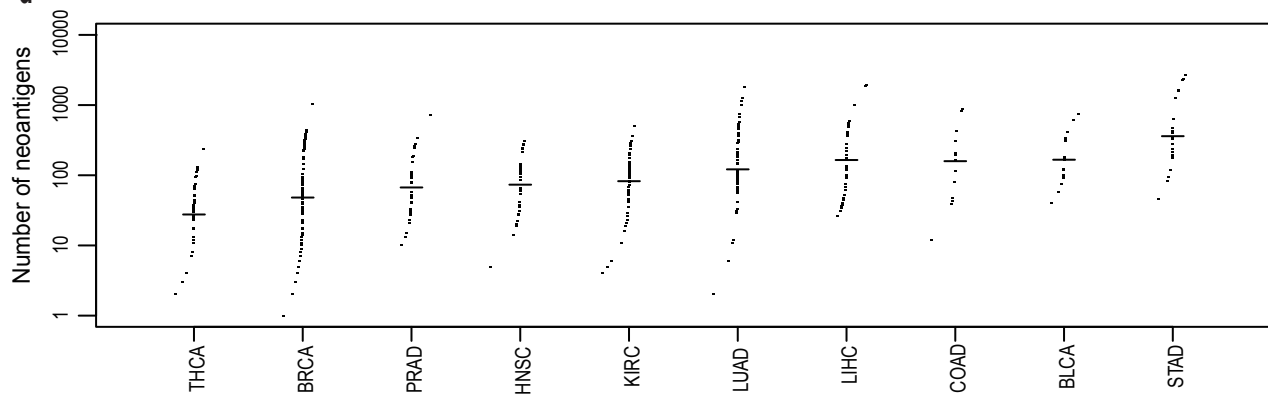

**e**

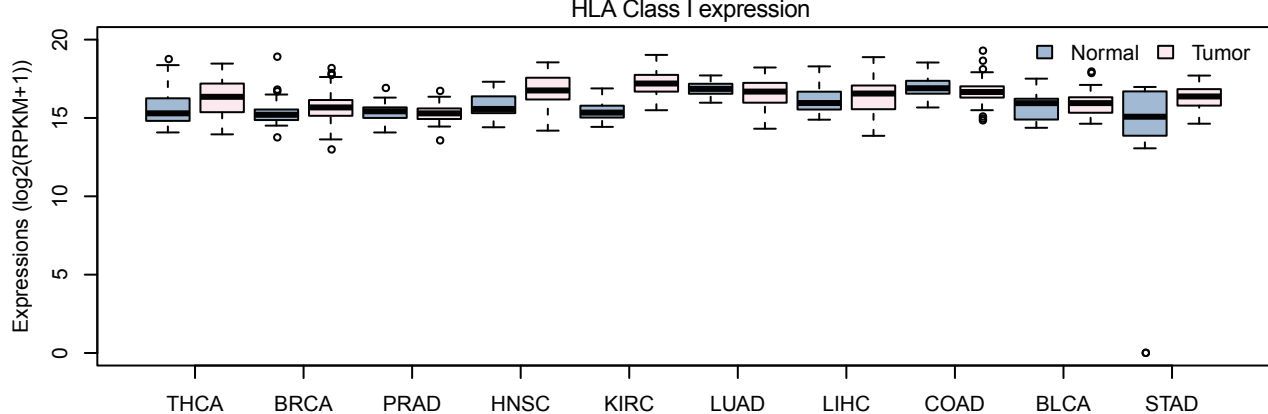

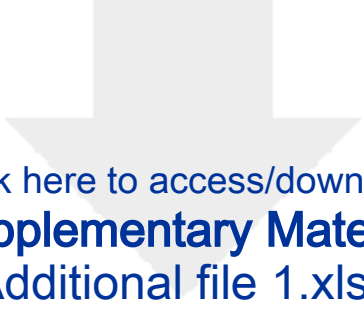

Click here to access/download  
**Supplementary Material**  
Additional file 1.xlsx



Supplement: gix017_GIGA-D-16-00055_Revision_1.pdf [file gix017_GIGA-D-16-00055_Revision_1.pdf]
